# Supplementary material for: Palladium-catalyzed carbonylative Sonogashira coupling of aryl diazonium salts with formic acid as the CO source: the effect of 1,3-butadiene
Source: Royal Society of Chemistry journal article supplement (doi:10.1039/c7cy01773a), 2017-01-01

## **Supporting information**

### **CONTENTS**

1. General information
2. Optimization of the Reaction Condition
3. General Procedure
4. Spectroscopic Data of Products
5. References
6. Copy of  $^1\text{H}$  and  $^{13}\text{C}$  NMR Spectra of Products

## 1. General information

Except for the tetrafluoroborate diazonium salt, all reagents were from commercial sources and used as received without further purification. All solvents were dried by standard techniques, and distilled prior to use. Column chromatography was performed on silica gel (200-300 meshes) using petroleum ether (bp. 60~90 °C) and ethyl acetate as eluent.  $^1\text{H}$  and  $^{13}\text{C}$  NMR spectra were taken on 400 MHz instruments and spectral data were reported in ppm relative to tetramethylsilane (TMS) as internal standard and  $\text{CDCl}_3$  as solvent. Mass spectra (MS) were measured on spectrometer by direct inlet at 70 eV.

The tetrafluoroborate diazonium salt (**1a-1i**) used here were synthesized according to the reported methods.<sup>[1]</sup>

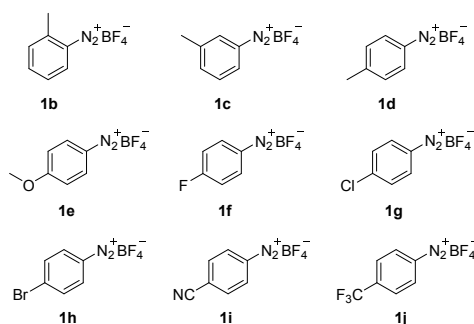

## 2. Optimization of the Reaction Condition

**Table 1. Screening of the solvent.**<sup>[a]</sup>

| Entry | Pd                        | Ligand | Solvent                | Yield (%) <sup>[b]</sup> |
|-------|---------------------------|--------|------------------------|--------------------------|
| 1     | $\text{Pd}(\text{OAc})_2$ | TFP    | THF/DMSO               | 42%                      |
| 2     | $\text{Pd}(\text{OAc})_2$ | TFP    | toluene                | 22%                      |
| 3     | $\text{Pd}(\text{OAc})_2$ | TFP    | DMSO                   | 44%                      |
| 4     | $\text{Pd}(\text{OAc})_2$ | TFP    | DMF                    | 21%                      |
| 5     | $\text{Pd}(\text{OAc})_2$ | TFP    | THF                    | 23%                      |
| 6     | $\text{Pd}(\text{OAc})_2$ | TFP    | $\text{CH}_3\text{CN}$ | 0%                       |
| 7     | $\text{Pd}(\text{OAc})_2$ | TFP    | Dioxane                | 39%                      |

[a] Reaction condition: phenyl diazonium tetrafluoroborate (0.5 mmol), phenylacetylene (1.0 mmol),  $\text{Pd}(\text{OAc})_2$  (3 mol%), TFP (6 mol%), 2,3-Dimethylbuta-1,3-diene (0.75 mmol), formic acid (1.0 mmol), DCC (1.0 mmol), solvent (2 mL), 20 h. [b] GC yield, with dodecane as the internal standard.

**Table 2. Screening of the ligand.**<sup>[a]</sup>

| Entry | Pd                        | Ligand         | Solvent | Yield (%) <sup>[b]</sup> |
|-------|---------------------------|----------------|---------|--------------------------|
| 1     | $\text{Pd}(\text{OAc})_2$ | $\text{PPh}_3$ | DMSO    | 72% <sup>[c]</sup>       |
| 2     | $\text{Pd}(\text{OAc})_2$ | TFP            | DMSO    | 44%                      |
| 3     | $\text{Pd}(\text{OAc})_2$ | Xphos          | DMSO    | 44%                      |

|    |                      |                                        |      |     |
|----|----------------------|----------------------------------------|------|-----|
| 4  | Pd(OAc) <sub>2</sub> | PCy <sub>3</sub>                       | DMSO | 52% |
| 5  | Pd(OAc) <sub>2</sub> | P(o-tolyl) <sub>3</sub>                | DMSO | 31% |
| 6  | Pd(OAc) <sub>2</sub> | BuPAd <sub>2</sub>                     | DMSO | 32% |
| 7  | Pd(OAc) <sub>2</sub> | Tri(naphthalen-1-yl)phosphine          | DMSO | 40% |
| 8  | Pd(OAc) <sub>2</sub> | 2-(di-tert-butylphosphine)<br>biphenyl | DMSO | 23% |
| 9  | Pd(OAc) <sub>2</sub> | (t-Bu) <sub>3</sub> P·HBF <sub>4</sub> | DMSO | 43% |
| 10 | Pd(OAc) <sub>2</sub> | DPPF                                   | DMSO | 10% |
| 11 | Pd(OAc) <sub>2</sub> | Xantphos                               | DMSO | 63% |
| 12 | Pd(OAc) <sub>2</sub> | Tris (4-methoxyphenyl) phosphine       | DMSO | 39% |
| 13 | Pd(OAc) <sub>2</sub> | DPPE                                   | DMSO | 0%  |
| 14 | Pd(OAc) <sub>2</sub> | DPPB                                   | DMSO | 55% |
| 15 | Pd(OAc) <sub>2</sub> | DPEphos                                | DMSO | 37% |

[a] Reaction condition: phenyl diazonium tetrafluoroborate (0.5 mmol), phenylacetylene (1.0 mmol), Pd(OAc)<sub>2</sub> (3 mol%), P:Pd = 2:1, 2,3-Dimethylbuta-1,3-diene (0.75 mmol), formic acid (1.0 mmol), DCC (1.0 mmol), DMSO (2 mL), 20 h. [b] GC yield, with dodecane as the internal standard. [c] Isolated yield.

**Table 3. Screening of the Palladium catalyst.<sup>[a]</sup>**

| Entry | Cat.                                  | Ligand           | Solvent | Yield (%) <sup>[b]</sup> |
|-------|---------------------------------------|------------------|---------|--------------------------|
| 1     | Pd(OAc) <sub>2</sub>                  | PPh <sub>3</sub> | DMSO    | 72% <sup>[c]</sup>       |
| 2     | (CF <sub>3</sub> COO) <sub>2</sub> Pd | PPh <sub>3</sub> | DMSO    | 63%                      |
| 3     | PdCl <sub>2</sub>                     | PPh <sub>3</sub> | DMSO    | 15%                      |
| 4     | Pd <sub>2</sub> (dba) <sub>3</sub>    | PPh <sub>3</sub> | DMSO    | 5%                       |
| 5     | Pd(PPh <sub>3</sub> ) <sub>4</sub>    | PPh <sub>3</sub> | DMSO    | 25%                      |

[a] Reaction condition: phenyl diazonium tetrafluoroborate (0.5 mmol), phenylacetylene (1.0 mmol), Pd (3 mol%), PPh<sub>3</sub> (6 mol%), 2,3-Dimethylbuta-1,3-diene (0.75 mmol), formic acid (1.0 mmol), DCC (1.0 mmol), DMSO (2 mL), 20 h. [b] GC yield, with dodecane as the internal standard. [c] Isolated yield.

**Table 4. Screening of the additives.<sup>[a]</sup>**

| Entry | additive                                   | Yield (%) <sup>[b]</sup> |
|-------|--------------------------------------------|--------------------------|
| 1     | 4Å MS                                      | 43%                      |
| 2     | ( <i>n</i> -Bu) <sub>4</sub> NI (10 mol%). | 29%                      |

[a] Reaction condition: phenyl diazonium tetrafluoroborate (0.5 mmol), phenylacetylene (1.0 mmol), Pd(OAc)<sub>2</sub> (3 mol%), PPh<sub>3</sub> (6 mol%), 2,3-Dimethylbuta-1,3-diene (0.75 mmol), formic acid (1.0 mmol), DCC (1.0 mmol), DMSO (2 mL), 20 h. [b] GC yield, with dodecane as the internal standard.

**Table 5. The amount loading of diene.**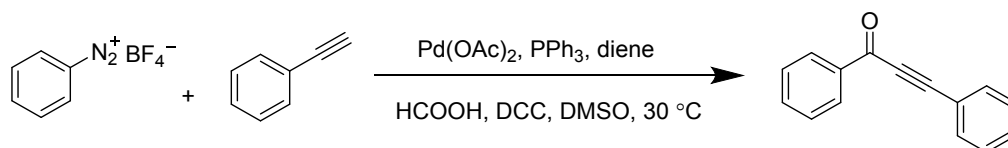

| Diene     | Yield (%)         |
|-----------|-------------------|
| 1.5 equiv | 72 <sup>[b]</sup> |
| 1.0 equiv | 41                |
| 0.5 equiv | 38                |
| 0.2 equiv | 33                |

[a] Reaction condition: Benzenediazonium tetrafluoroborate (0.5 mmol), phenylacetylene (1 mmol), Pd(OAc)<sub>2</sub> (3 mol%), PPh<sub>3</sub> (6 mol%), 2,3-dimethylbuta-1,3-diene (x equiv.), formic (1 mmol), DCC (1 mmol), DMSO (2 mL), 20 h. [b] Isolated yields.

**Table 6. Control experiments.**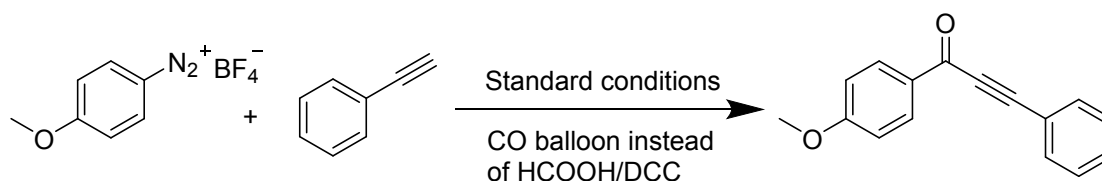

| Entry | condition                                          | Yield (%) <sup>[b]</sup>   |
|-------|----------------------------------------------------|----------------------------|
| 1     | CO balloon, No diene                               | 50                         |
| 2     | CO balloon, diene                                  | 63                         |
| 3     | CO balloon, No diene, DCU <sup>[d]</sup>           | trace                      |
| 4     | CO balloon, diene, DCU                             | trace                      |
| 5     | CO balloon, No diene, Et <sub>3</sub> N (2 equiv.) | trace                      |
| 6     | CO balloon, diene, Et <sub>3</sub> N (2 equiv.)    | trace                      |
| 7     | CO balloon, diene, HCOOH, DCU                      | 39                         |
| 8     | CO balloon, No diene, HCOOH, DCU                   | 24                         |
| 9     | CO balloon, diene, HCOOH (2 equiv.)                | 99 (91) <sup>[c]</sup>     |
| 10    | CO balloon, No diene, HCOOH (2 equiv.)             | 46                         |
| 11    | diene, HCOOH (2 equiv.)                            | None                       |
| 12    | DCC (40 mol%), diene, HCOOH (2 equiv.)             | trace                      |
| 13    | CO balloon, diene, HCOOH (2 equiv.)                | No reaction <sup>[e]</sup> |

[a] Reaction condition: *p*-methoxybenzenediazonium tetrafluoroborate (0.5 mmol), phenylacetylene (1 mmol), Pd(OAc)<sub>2</sub> (3 mol%), PPh<sub>3</sub> (6 mol%), 2,3-dimethylbuta-1,3-diene (0.75 mmol), CO balloon, DMSO (2 mL), 20 h. [b] Yield was determined by NMR. [c] Isolated yields. [d] DCU is 1,3-dicyclohexylurea. [e] No phenylacetylene.

### 3. General Procedure

$\text{Pd}(\text{OAc})_2$  (3.4 mg, 3 mol%),  $\text{PPh}_3$  (7.8 mg, 6 mol%), benzenediazonium tetrafluoroborate (96 mg, 0.5 mmol) and DCC (206.1 mg, 1 mmol) were transferred into an oven-dried tube which was filled with nitrogen. DMSO (2.0 mL), 1,3-butadiene (375  $\mu\text{L}$ , 2 mol/L) and phenylacetylene (110  $\mu\text{L}$ , 1 mmol) were added to the reaction tube. After formic acid (38  $\mu\text{L}$ , 1 mmol) were added, the tube was sealed and the mixture was stirred at 30 °C for 20 h. After the reaction finished, the reaction mixture was extracted with ethyl acetate three times and dried with sodium sulfate. The crude product was filtered and concentrated under vacuum and was purified by column chromatography on silica gel column EtOAc/petroleum ether (1/200 to 1/50) to give the desired product.

## 4. Spectroscopic Data of Products

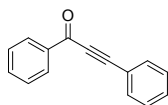

### 1,3-Diphenylprop-2-yn-1-one (3a)

Prepared with Benzenediazonium tetrafluoroborate (96 mg, 0.5 mmol) and phenylacetylene (110 uL, 1 mmol) using the general procedure. The crude material was purified by chromatography column (EtOAc/petroleum ether = 1:50) to give **3a** (95.2 mg, 90% yield) as a red oil.

**<sup>1</sup>H NMR (400 MHz, CDCl<sub>3</sub>)** δ 8.26 (d, *J* = 7.1 Hz, 2H), 7.72 (d, *J* = 6.9 Hz, 2H), 7.65 (d, *J* = 6.8 Hz, 1H), 7.54 (dd, *J* = 16.8, 10.2 Hz, 3H), 7.46 (d, *J* = 7.4 Hz, 2H); **<sup>13</sup>C NMR (101 MHz, CDCl<sub>3</sub>)** δ 178.01, 136.97, 134.09, 133.07, 130.78, 129.59, 128.69, 128.63, 120.21, 93.09, 86.93.

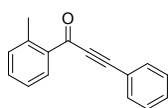

### 3-Phenyl-1-(*o*-tolyl)prop-2-yn-1-one (3b)

Prepared with 2-Methylbenzenediazonium tetrafluoroborate (103 mg, 0.5 mmol) and phenylacetylene (110 uL, 1 mmol) using the general procedure. The crude material was purified by chromatography column (EtOAc/petroleum ether = 1:50) to give **3b** (70.4 mg, 64% yield) as a red oil.

**<sup>1</sup>H NMR (400 MHz, CDCl<sub>3</sub>)** δ 8.33 (d, *J* = 7.7 Hz, 1H), 7.74 – 7.65 (m, 2H), 7.53 – 7.46 (m, 2H), 7.46 – 7.38 (m, 3H), 7.31 (d, *J* = 7.5 Hz, 1H), 2.71 (s, 3H); **<sup>13</sup>C NMR (101 MHz, CDCl<sub>3</sub>)** δ 179.81, 140.51, 135.74, 133.22, 133.18, 132.94, 132.20, 130.61, 128.66, 125.91, 120.37, 91.83, 88.40, 21.97.

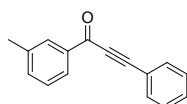

### 3-Phenyl-1-(*m*-tolyl)prop-2-yn-1-one (3c)

Prepared with 3-Methylbenzenediazonium tetrafluoroborate (103 mg, 0.5 mmol) and phenylacetylene (110 uL, 1 mmol) using the general procedure. The crude material was purified by chromatography column (EtOAc/petroleum ether = 1:50) to give **3c** (90.2 mg, 82% yield) as a red oil.

**<sup>1</sup>H NMR (400 MHz, CDCl<sub>3</sub>)** δ 8.13 – 8.00 (m, 2H), 7.72 (d, *J* = 7.2 Hz, 2H), 7.51 (d, *J* = 7.3 Hz, 1H), 7.45 (t, *J* = 7.3 Hz, 4H), 2.48 (s, 3H); **<sup>13</sup>C NMR (101 MHz, CDCl<sub>3</sub>)** δ 178.27, 138.53, 136.94, 135.01, 133.08, 130.76, 129.82, 128.70, 128.54, 127.16, 120.24, 92.90, 87.03, 21.36.

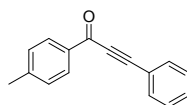

### 3-Phenyl-1-(*p*-tolyl)prop-2-yn-1-one (3d)

Prepared with 4-Methylbenzenediazonium tetrafluoroborate (103 mg, 0.5 mmol) and phenylacetylene (110 uL, 1 mmol) using the general procedure. The crude material was purified

by chromatography column (EtOAc/petroleum ether = 1:50) to give **3d** (81.4 mg, 74% yield) as a yellow oil.

**<sup>1</sup>H NMR (400 MHz, CDCl<sub>3</sub>)** δ 8.13 (d, *J* = 8.2 Hz, 2H), 7.72 – 7.67 (m, 2H), 7.49 (dd, *J* = 6.2, 4.0 Hz, 1H), 7.43 (t, *J* = 7.3 Hz, 2H), 7.33 (d, *J* = 8.0 Hz, 2H), 2.46 (s, 3H); **<sup>13</sup>C NMR (101 MHz, CDCl<sub>3</sub>)** δ 177.78, 145.27, 134.64, 133.06, 130.70, 129.74, 129.38, 128.69, 120.30, 92.63, 86.99, 21.87.

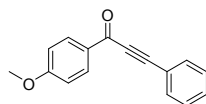

1-(4-Methoxyphenyl)-3-phenylprop-2-yn-1-one (**3e**)

Prepared with 4-Methoxybenzenediazonium tetrafluoroborate (111 mg, 0.5 mmol) and phenylacetylene (110 uL, 1 mmol) using the general procedure. The crude material was purified by chromatography column (EtOAc/petroleum ether = 1:20) to give **3e** (103.8 mg, 88% yield) as a red oil.

**<sup>1</sup>H NMR (400 MHz, CDCl<sub>3</sub>)** δ 8.29 – 8.14 (m, 2H), 7.69 (dd, *J* = 8.2, 1.4 Hz, 2H), 7.51 – 7.40 (m, 3H), 7.00 (d, *J* = 8.9 Hz, 2H), 3.90 (s, 3H); **<sup>13</sup>C NMR (101 MHz, CDCl<sub>3</sub>)** δ 176.69, 164.52, 132.98, 132.00, 130.63, 130.31, 128.68, 120.35, 113.92, 92.35, 86.95, 55.62.

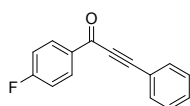

1-(4-Fluorophenyl)-3-phenylprop-2-yn-1-one (**3f**)

Prepared with 4-Fluorobenzenediazonium tetrafluoroborate (105 mg, 0.5 mmol) and phenylacetylene (110 uL, 1 mmol) using the general procedure. The crude material was purified by chromatography column (EtOAc/petroleum ether = 1:50) to give **3f** (87.4 mg, 78% yield) as a red oil.

**<sup>1</sup>H NMR (400 MHz, CDCl<sub>3</sub>)** δ 8.28 (dd, *J* = 8.6, 5.5 Hz, 2H), 7.73 – 7.68 (m, 2H), 7.55 – 7.50 (m, 1H), 7.46 (t, *J* = 7.3 Hz, 2H), 7.22 (t, *J* = 8.5 Hz, 2H); **<sup>13</sup>C NMR (101 MHz, CDCl<sub>3</sub>)** δ 176.43, 167.77, 133.08, 132.21, 130.93, 128.75, 119.99, 116.01, 115.79, 93.39, 86.61.

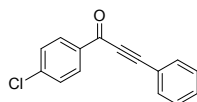

1-(4-Chlorophenyl)-3-phenylprop-2-yn-1-one (**3g**)

Prepared with 4-Chlorobenzenediazonium tetrafluoroborate (113 mg, 0.5 mmol) and phenylacetylene (110 uL, 1 mmol) using the general procedure. The crude material was purified by chromatography column (EtOAc/petroleum ether = 1:50) to give **3g** (88.8 mg, 74% yield) as a yellow oil.

**<sup>1</sup>H NMR (400 MHz, CDCl<sub>3</sub>)** δ 8.17 (d, *J* = 8.6 Hz, 2H), 7.72 – 7.68 (m, 2H), 7.51 (t, *J* = 7.5 Hz, 3H), 7.44 (t, *J* = 7.4 Hz, 2H); **<sup>13</sup>C NMR (101 MHz, CDCl<sub>3</sub>)** δ 176.70, 140.75, 135.31, 133.14, 131.01, 130.89, 129.04, 128.77, 119.90, 93.68, 86.60.

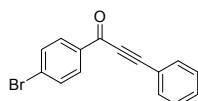

#### 1-(4-Bromophenyl)-3-phenylprop-2-yn-1-one (**3h**)

Prepared with 4-Bromobenzenediazonium tetrafluoroborate (135 mg, 0.5 mmol) and phenylacetylene (110  $\mu$ L, 1 mmol) using the general procedure. The crude material was purified by chromatography column (EtOAc/petroleum ether = 1:50) to give **3h** (88.0 mg, 62% yield) as a yellow oil.

**<sup>1</sup>H NMR (400 MHz, CDCl<sub>3</sub>)**  $\delta$  8.08 (d,  $J$  = 8.6 Hz, 2H), 7.68 (t,  $J$  = 8.3 Hz, 4H), 7.53 – 7.48 (m, 1H), 7.44 (t,  $J$  = 7.4 Hz, 2H); **<sup>13</sup>C NMR (101 MHz, CDCl<sub>3</sub>)**  $\delta$  176.87, 135.71, 133.15, 132.02, 131.03, 130.96, 129.60, 128.78, 119.88, 93.73, 86.60.

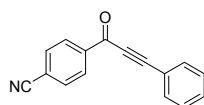

#### 4-(3-Phenylpropiolyl)benzonitrile (**3i**)

Prepared with 4-Cyanobenzenediazonium tetrafluoroborate (108.5 mg, 0.5 mmol) and phenylacetylene (110  $\mu$ L, 1 mmol) using the general procedure. The crude material was purified by chromatography column (EtOAc/petroleum ether = 1:20) to give **3i** (63.5 mg, 55% yield) as a white solid.

**<sup>1</sup>H NMR (400 MHz, CDCl<sub>3</sub>)**  $\delta$  8.33 (d,  $J$  = 8.2 Hz, 2H), 7.85 (d,  $J$  = 8.2 Hz, 2H), 7.74 – 7.69 (m, 2H), 7.55 (t,  $J$  = 7.4 Hz, 1H), 7.47 (t,  $J$  = 7.5 Hz, 2H); **<sup>13</sup>C NMR (101 MHz, CDCl<sub>3</sub>)**  $\delta$  176.22, 139.65, 133.27, 132.53, 131.41, 129.84, 128.86, 119.46, 117.90, 117.17, 95.17, 86.44.

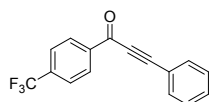

#### 3-Phenyl-1-(4-(trifluoromethyl)phenyl)prop-2-yn-1-one (**3j**)

Prepared with 4-(Trifluoromethyl)benzenediazonium tetrafluoroborate (130 mg, 0.5 mmol) and phenylacetylene (110  $\mu$ L, 1 mmol) using the general procedure. The crude material was purified by chromatography column (EtOAc/petroleum ether = 1:50) to give **3j** (57.5 mg, 42% yield) as a yellow solid.

**<sup>1</sup>H NMR (400 MHz, CDCl<sub>3</sub>)**  $\delta$  8.35 (d,  $J$  = 8.1 Hz, 2H), 7.82 (d,  $J$  = 8.2 Hz, 2H), 7.77 – 7.69 (m, 2H), 7.55 (t,  $J$  = 7.4 Hz, 1H), 7.47 (t,  $J$  = 7.4 Hz, 2H); **<sup>13</sup>C NMR (101 MHz, CDCl<sub>3</sub>)**  $\delta$  176.76, 149.01, 139.39, 133.22, 131.23, 129.82, 128.82, 125.72, 119.68, 94.51, 88.19, 86.59.

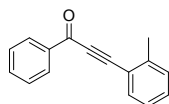

#### 1-Phenyl-3-(*o*-tolyl)prop-2-yn-1-one (**3k**)

Prepared with Benzenediazonium tetrafluoroborate (96 mg, 0.5 mmol) and 1-Ethynyl-2-methylbenzene (126  $\mu$ L, 1 mmol) using the general procedure. The crude material was purified by chromatography column (EtOAc/petroleum ether = 1:50) to give **3k** (81.4 mg, 74% yield) as a red oil.



**<sup>1</sup>H NMR (400 MHz, CDCl<sub>3</sub>)** δ 8.13 (d, *J* = 8.5 Hz, 2H), 7.72 – 7.65 (m, 2H), 7.52 – 7.46 (m, 1H), 7.42 (dd, *J* = 11.4, 4.4 Hz, 2H), 7.31 (d, *J* = 8.5 Hz, 2H), 2.54 (s, 3H); **<sup>13</sup>C NMR (101 MHz, CDCl<sub>3</sub>)** δ 178.09, 142.20, 137.06, 134.07, 133.69, 130.84, 129.91, 129.57, 128.66, 125.97, 120.02, 92.21, 90.77, 20.92.

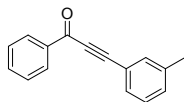

**1-Phenyl-3-(*m*-tolyl)prop-2-yn-1-one (3l)**

Prepared with Benzenediazonium tetrafluoroborate (96 mg, 0.5 mmol) and 1-Ethynyl-3-methylbenzene (125 uL, 1 mmol) using the general procedure. The crude material was purified by chromatography column (EtOAc/petroleum ether = 1:50) to give **3l** (92.4 mg, 84% yield) as a red oil.

**<sup>1</sup>H NMR (400 MHz, CDCl<sub>3</sub>)** δ 8.35 – 8.21 (m, 2H), 7.72 – 7.62 (m, 2H), 7.55 (t, *J* = 7.7 Hz, 2H), 7.40 (t, *J* = 7.5 Hz, 1H), 7.32 (d, *J* = 7.6 Hz, 1H), 7.27 (d, *J* = 7.9 Hz, 1H), 2.62 (s, 3H); **<sup>13</sup>C NMR (101 MHz, CDCl<sub>3</sub>)** δ 178.08, 142.20, 137.07, 134.08, 133.70, 130.86, 129.92, 129.57, 128.67, 125.97, 120.02, 92.22, 90.79, 20.92.

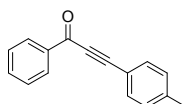

**1-Phenyl-3-(*p*-tolyl)prop-2-yn-1-one (3m)**

Prepared with Benzenediazonium tetrafluoroborate (96 mg, 0.5 mmol) and 1-Ethynyl-4-methylbenzene (127 uL, 1 mmol) using the general procedure. The crude material was purified by chromatography column (EtOAc/petroleum ether = 1:50) to give **3m** (96.8 mg, 88% yield) as a red oil.

**<sup>1</sup>H NMR (400 MHz, CDCl<sub>3</sub>)** δ 8.26 (d, *J* = 7.1 Hz, 2H), 7.66 (t, *J* = 7.4 Hz, 1H), 7.54 (dd, *J* = 13.1, 7.4 Hz, 4H), 7.34 (dd, *J* = 10.3, 3.6 Hz, 2H), 2.41 (s, 3H); **<sup>13</sup>C NMR (101 MHz, CDCl<sub>3</sub>)** δ 178.08, 138.56, 136.96, 133.59, 131.80, 130.27, 129.60, 128.65, 119.94, 93.56, 86.70, 21.21.

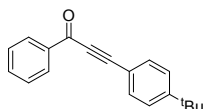

**3-(4-(*tert*-Butyl)phenyl)-1-phenylprop-2-yn-1-one (3n)**

Prepared with Benzenediazonium tetrafluoroborate (96 mg, 0.5 mmol) and 1-(*tert*-Butyl)-4-ethynylbenzene (180 uL, 1 mmol) using the general procedure. The crude material was purified by chromatography column (EtOAc/petroleum ether = 1:50) to give **3n** (93.0 mg, 71% yield) as a red oil.

**<sup>1</sup>H NMR (400 MHz, CDCl<sub>3</sub>)** δ 8.26 (d, *J* = 7.9 Hz, 2H), 7.65 (d, *J* = 8.2 Hz, 3H), 7.53 (d, *J* = 7.5 Hz, 2H), 7.45 (d, *J* = 7.9 Hz, 2H), 1.35 (s, 9H); **<sup>13</sup>C NMR (101 MHz, CDCl<sub>3</sub>)** δ 178.06, 154.61, 137.02, 134.07, 133.05, 129.57, 128.65, 125.81, 117.04, 93.86, 86.81, 35.10, 31.08.

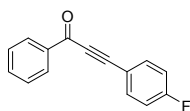

### 3-(4-Fluorophenyl)-1-phenylprop-2-yn-1-one (**3o**)

Prepared with Benzenediazonium tetrafluoroborate (96 mg, 0.5 mmol) and 1-Ethynyl-4-fluorobenzene (114  $\mu$ L, 1 mmol) using the general procedure. The crude material was purified by chromatography column (EtOAc/petroleum ether = 1:50) to give **3o** (90.7 mg, 81% yield) as a yellow solid.

**<sup>1</sup>H NMR (400 MHz, CDCl<sub>3</sub>)**  $\delta$  8.22 (dd,  $J$  = 8.1, 1.0 Hz, 2H), 7.72 – 7.67 (m, 2H), 7.64 (dd,  $J$  = 10.5, 4.2 Hz, 1H), 7.53 (t,  $J$  = 7.6 Hz, 2H), 7.13 (t,  $J$  = 8.7 Hz, 2H); **<sup>13</sup>C NMR (101 MHz, CDCl<sub>3</sub>)**  $\delta$  177.89, 165.30, 162.77, 136.79, 135.44, 135.35, 134.22, 129.56, 128.68, 116.38, 116.27, 116.15, 92.03, 86.83.

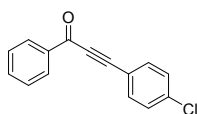

### 3-(4-Chlorophenyl)-1-phenylprop-2-yn-1-one (**3p**)

Prepared with Benzenediazonium tetrafluoroborate (96 mg, 0.5 mmol) and 1-Chloro-4-ethynylbenzene (118  $\mu$ L, 1 mmol) using the general procedure. The crude material was purified by chromatography column (EtOAc/petroleum ether = 1:50) to give **3p** (76.8 mg, 64% yield) as a yellow solid.

**<sup>1</sup>H NMR (400 MHz, CDCl<sub>3</sub>)**  $\delta$  8.22 (d,  $J$  = 8.0 Hz, 2H), 7.64 (dd,  $J$  = 14.7, 7.9 Hz, 3H), 7.53 (t,  $J$  = 7.6 Hz, 2H), 7.44 (dd,  $J$  = 23.7, 21.9 Hz, 2H); **<sup>13</sup>C NMR (101 MHz, CDCl<sub>3</sub>)**  $\delta$  177.81, 137.22, 136.73, 134.29, 134.28, 129.59, 129.18, 128.71, 118.59, 91.65, 87.61.

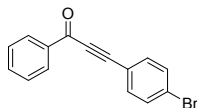

### 3-(4-Bromophenyl)-1-phenylprop-2-yn-1-one (**3q**)

Prepared with Benzenediazonium tetrafluoroborate (96 mg, 0.5 mmol) and 1-Bromo-4-ethynylbenzene (120  $\mu$ L, 1 mmol) using the general procedure. The crude material was purified by chromatography column (EtOAc/petroleum ether = 1:50) to give **3q** (103.7 mg, 73% yield) as a yellow solid.

**<sup>1</sup>H NMR (400 MHz, CDCl<sub>3</sub>)**  $\delta$  8.23 (d,  $J$  = 8.0 Hz, 2H), 7.66 (t,  $J$  = 7.3 Hz, 1H), 7.61 – 7.52 (m, 6H); **<sup>13</sup>C NMR (101 MHz, CDCl<sub>3</sub>)**  $\delta$  177.84, 136.73, 134.36, 134.30, 132.13, 129.60, 128.71, 125.63, 119.07, 91.67, 87.70.

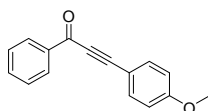

### 3-(4-Methoxyphenyl)-1-phenylprop-2-yn-1-one (**3r**)

Prepared with Benzenediazonium tetrafluoroborate (96 mg, 0.5 mmol) and 1-Ethynyl-4-methoxybenzene (130  $\mu$ L, 1 mmol) using the general procedure. The crude material was purified by chromatography column (EtOAc/petroleum ether = 1:50) to give **3r** (89.7 mg, 76% yield) as a

yellow solid.

**<sup>1</sup>H NMR (400 MHz, CDCl<sub>3</sub>)** δ 8.43 – 8.08 (m, 2H), 7.64 (ddd, *J* = 12.7, 8.3, 4.7 Hz, 3H), 7.53 (t, *J* = 7.6 Hz, 2H), 6.96 – 6.92 (m, 2H), 3.86 (s, 3H); **<sup>13</sup>C NMR (101 MHz, CDCl<sub>3</sub>)** δ 178.08, 161.78, 137.05, 135.18, 133.95, 129.50, 128.59, 114.46, 111.87, 94.42, 86.91, 55.46.

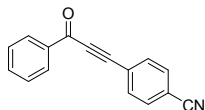

**4-(3-Oxo-3-phenylprop-1-yn-1-yl)benzonitrile (3s)**

Prepared with Benzenediazonium tetrafluoroborate (96 mg, 0.5 mmol) and 4-Ethynylbenzonitrile (118  $\mu$ L, 1 mmol) using the general procedure. The crude material was purified by chromatography column (EtOAc/petroleum ether = 1:20) to give **3s** (83.2 mg, 72% yield) as a yellow solid.

**<sup>1</sup>H NMR (400 MHz, CDCl<sub>3</sub>)** δ 8.22 (d, *J* = 8.0 Hz, 2H), 7.80 (d, *J* = 8.2 Hz, 2H), 7.75 (d, *J* = 8.1 Hz, 2H), 7.68 (d, *J* = 7.6 Hz, 1H), 7.56 (t, *J* = 7.6 Hz, 2H); **<sup>13</sup>C NMR (101 MHz, CDCl<sub>3</sub>)** δ 177.48, 136.45, 134.63, 133.30, 132.33, 129.66, 128.82, 124.97, 117.90, 114.07, 89.65, 89.40.

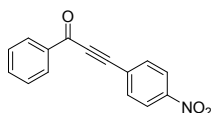

**3-(4-Nitrophenyl)-1-phenylprop-2-yn-1-one (3t)**

Prepared with Benzenediazonium tetrafluoroborate (96 mg, 0.5 mmol) and 1-Ethynyl-4-nitrobenzene (0.1470 g, 1 mmol) using the general procedure. The crude material was purified by chromatography column (EtOAc/petroleum ether = 1:20) to give **3t** (80.3 mg, 64% yield) as a yellow solid.

**<sup>1</sup>H NMR (400 MHz, CDCl<sub>3</sub>)** δ 8.31 (d, *J* = 8.7 Hz, 2H), 8.22 (d, *J* = 8.1 Hz, 2H), 7.86 (d, *J* = 8.6 Hz, 2H), 7.72 – 7.67 (m, 1H), 7.57 (t, *J* = 7.6 Hz, 2H); **<sup>13</sup>C NMR (101 MHz, CDCl<sub>3</sub>)** δ 177.41, 148.54, 136.39, 134.70, 133.69, 129.68, 128.85, 126.81, 123.87, 89.87, 89.21.

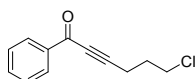

**3-(4-(3-Chloropropyl)phenyl)-1-phenylprop-2-yn-1-one (3u)**

Prepared with Benzenediazonium tetrafluoroborate (96 mg, 0.5 mmol) and 5-Chloropent-1-yne (107  $\mu$ L, 1 mmol) using the general procedure. The crude material was purified by chromatography column (EtOAc/petroleum ether = 1:20) to give **3u** (84.6 mg, 60% yield) as a red oil.

**<sup>1</sup>H NMR (400 MHz, CDCl<sub>3</sub>)** δ 8.15 (dd, *J* = 8.1, 1.0 Hz, 2H), 7.67 – 7.59 (m, 1H), 7.51 (t, *J* = 7.6 Hz, 2H), 3.74 (t, *J* = 6.2 Hz, 2H), 2.74 (t, *J* = 6.9 Hz, 2H), 2.16 (p, *J* = 6.7 Hz, 2H); **<sup>13</sup>C NMR (101 MHz, CDCl<sub>3</sub>)** δ 177.99, 136.74, 134.08, 129.57, 128.58, 94.17, 80.24, 43.38, 30.48, 16.65.

## 5. References

1. N. Zhang, Z.-J. Quan, Z. Zhang, Y.-X. Da and X.-C. Wang, *Chem. Commun.*, 2016, **52**, 14234.

The figure displays two NMR spectra for the compound 1-phenyl-2-phenylethyn-1-one, with its chemical structure shown in the top left corner of each plot.

**<sup>1</sup>H NMR Spectrum (Top):** The x-axis represents the chemical shift in ppm, ranging from -2 to 12. The spectrum shows several peaks in the aromatic region (7.45-8.27 ppm) and a set of peaks in the aliphatic region (1.45-1.75 ppm). Integration values are provided below the peaks: 2.00, 2.02, 1.05, 3.03, and 2.04. The chemical shift values are listed above the peaks: 8.27, 8.25, 7.73, 7.71, 7.66, 7.64, 7.57, 7.55, 7.53, 7.50, 7.47, and 7.45 ppm.

**<sup>13</sup>C NMR Spectrum (Bottom):** The x-axis represents the chemical shift in ppm, ranging from -10 to 210. The spectrum shows a large peak at 178.01 ppm (carbonyl carbon) and several peaks in the aromatic region (120.21-136.97 ppm). The chemical shift values are listed above the peaks: 178.01, 136.97, 134.09, 133.07, 130.78, 129.59, 128.69, 128.63, 120.21, 93.09, and 86.93 ppm.

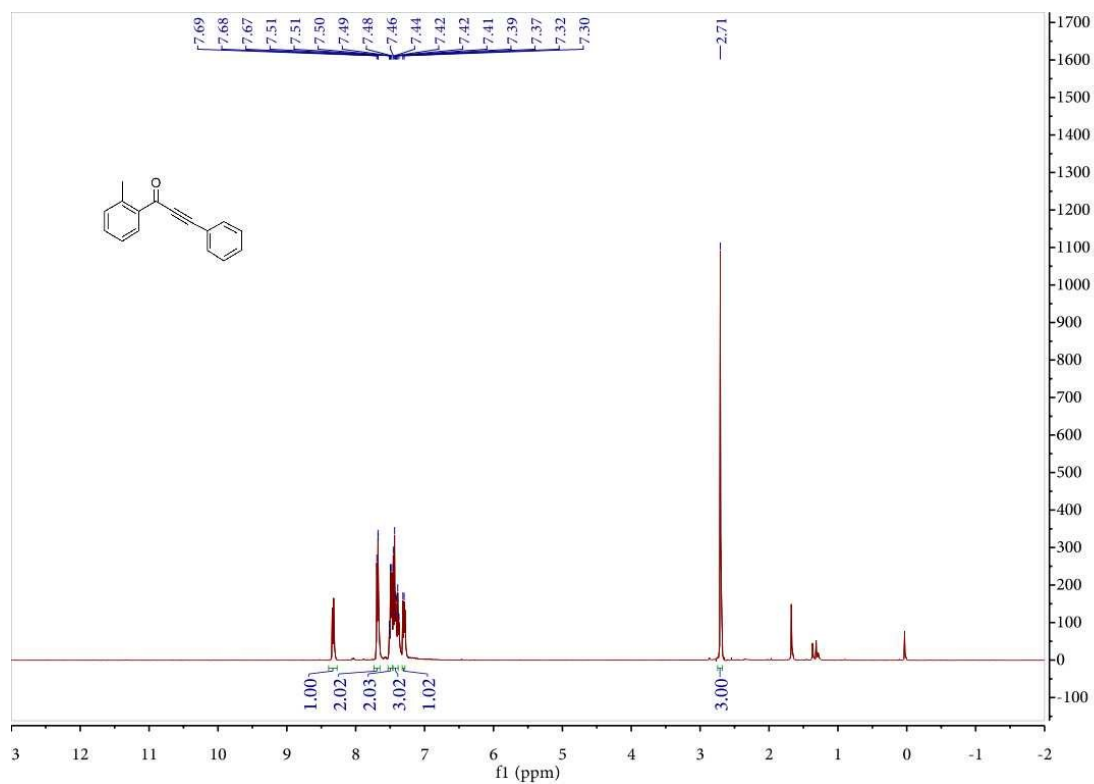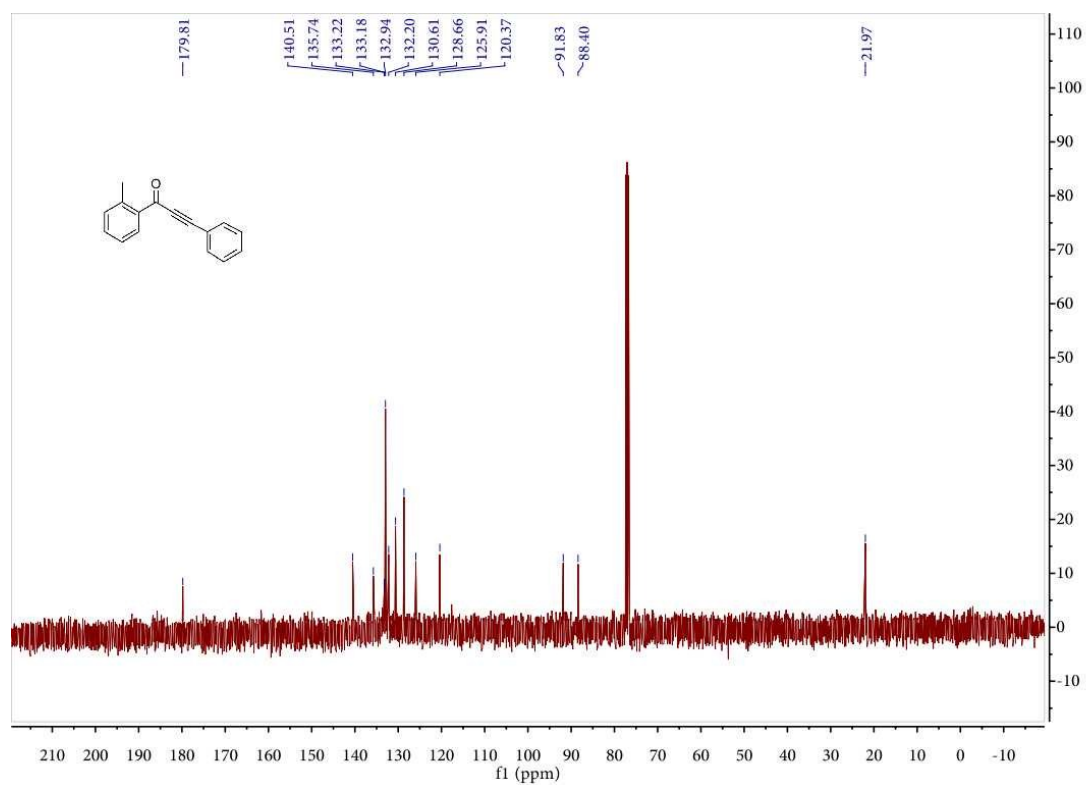

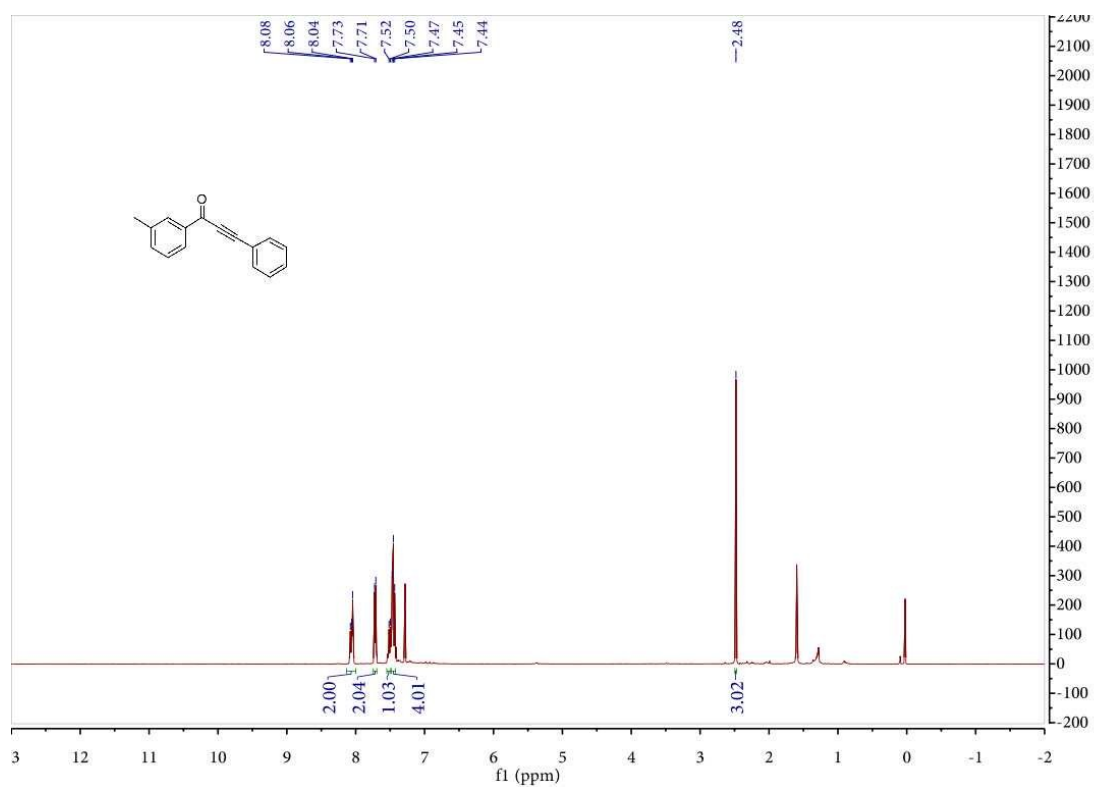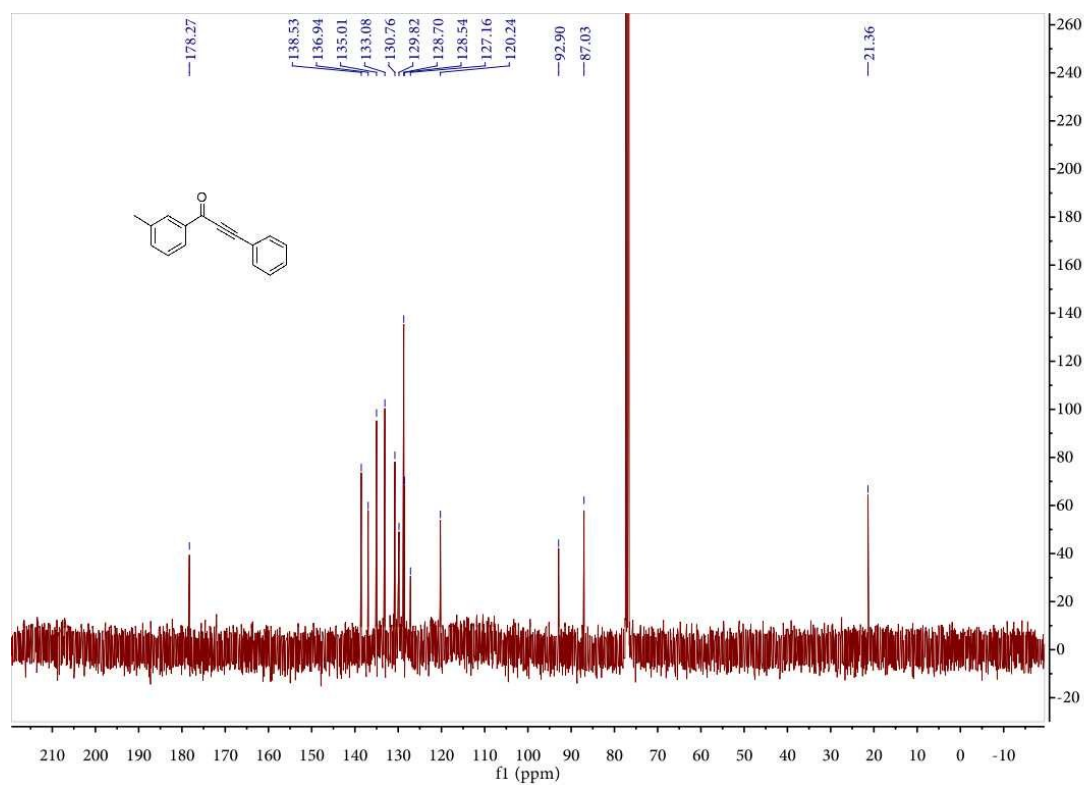

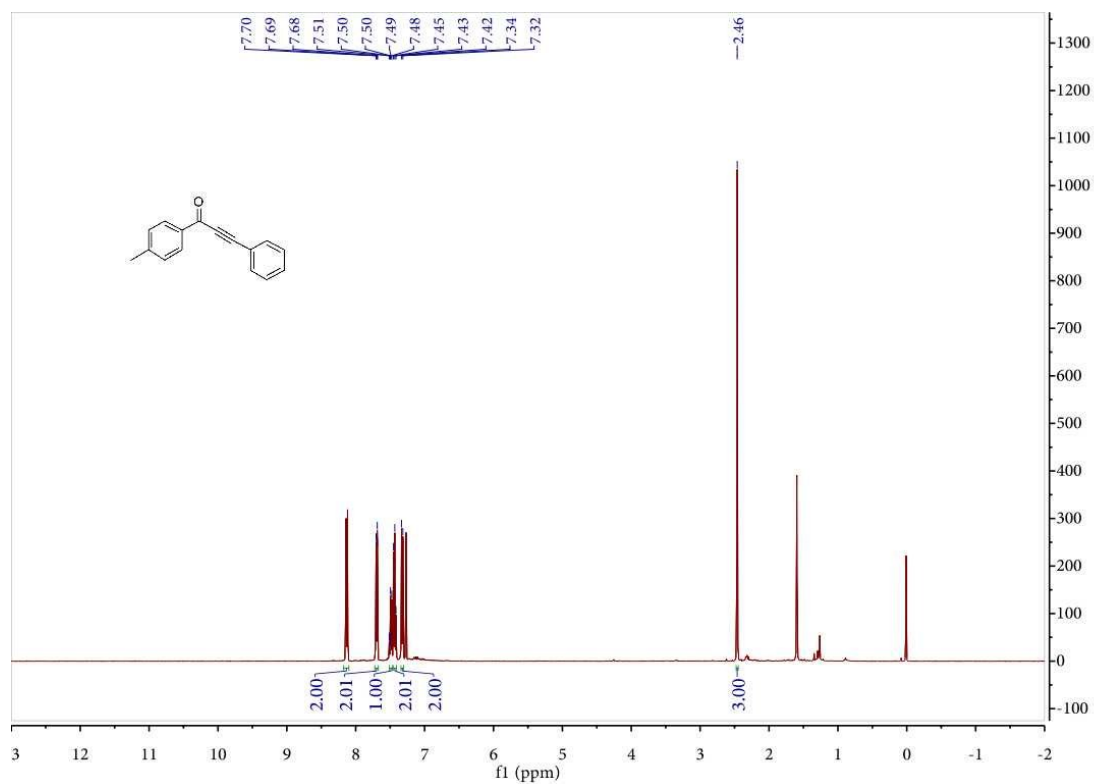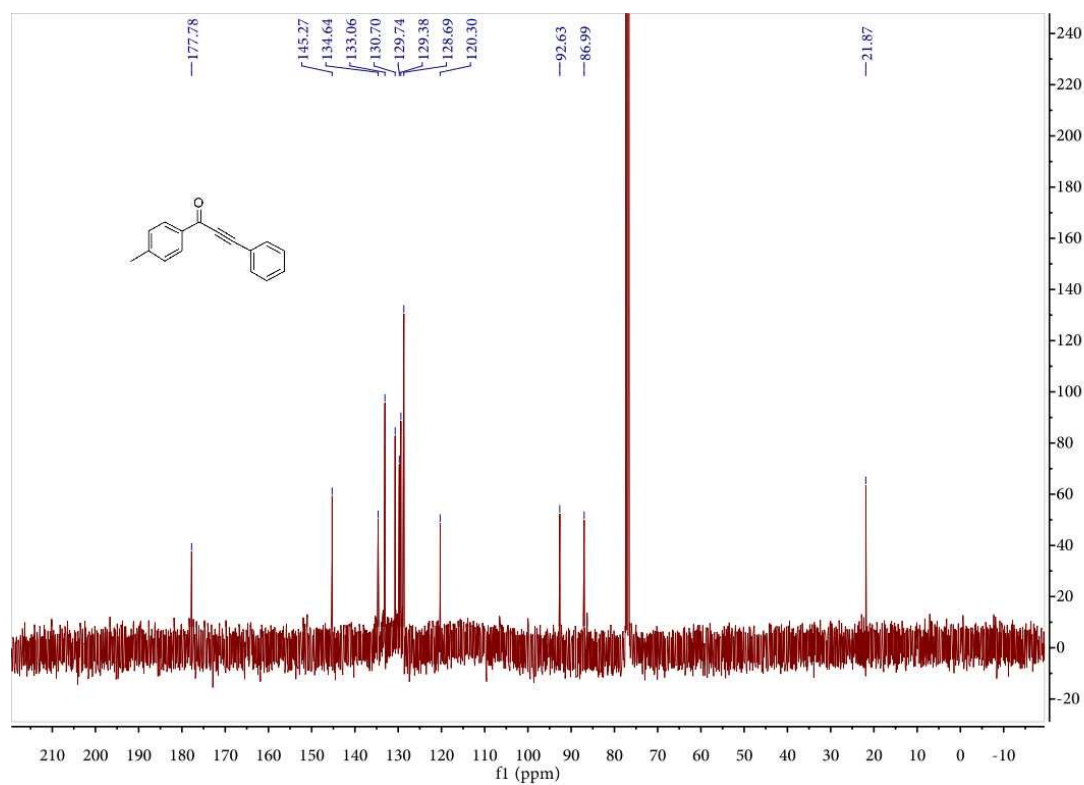

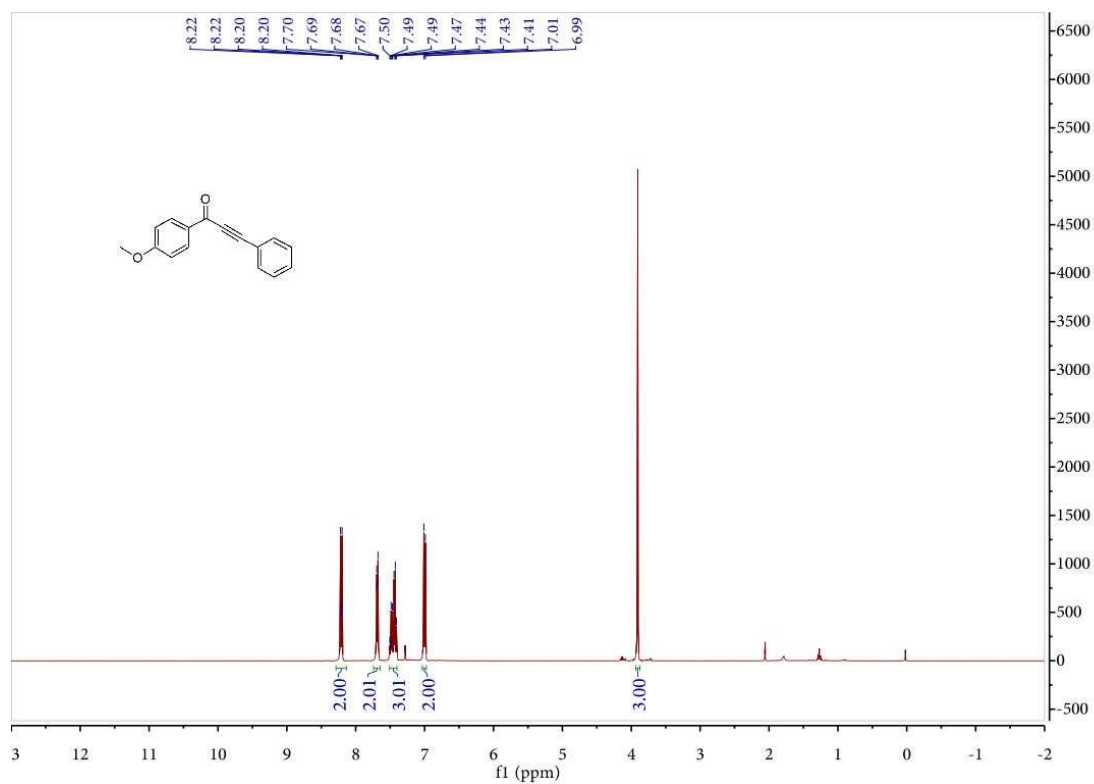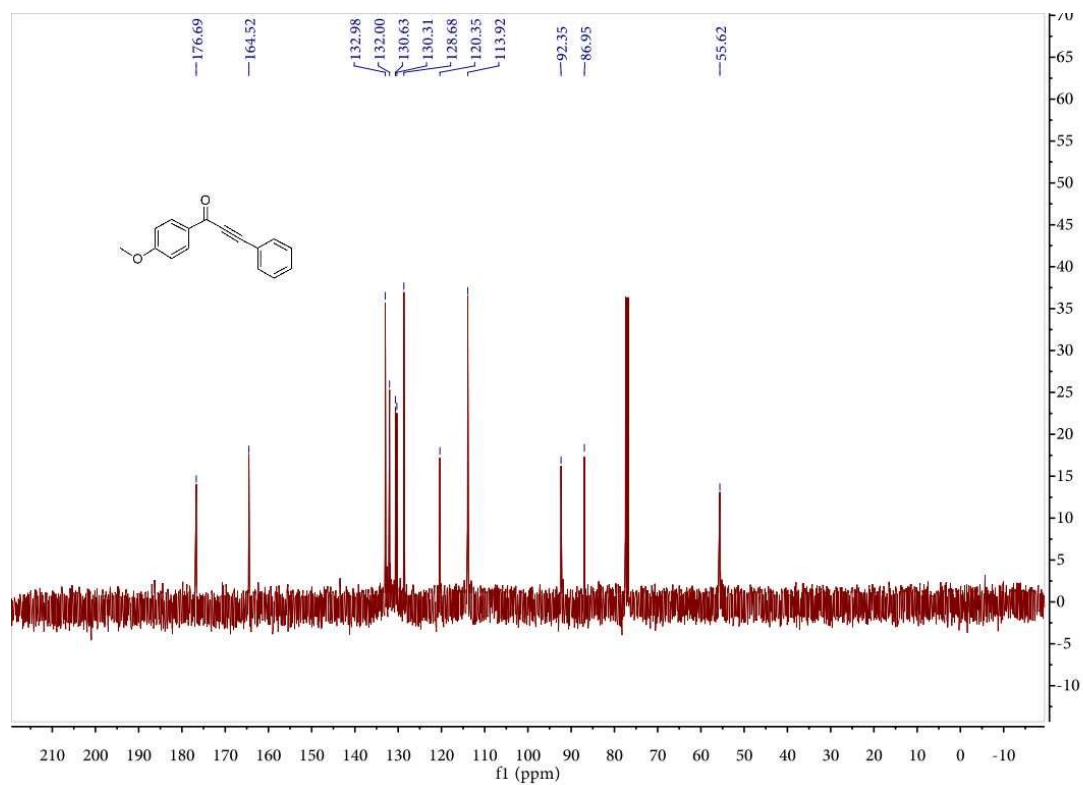



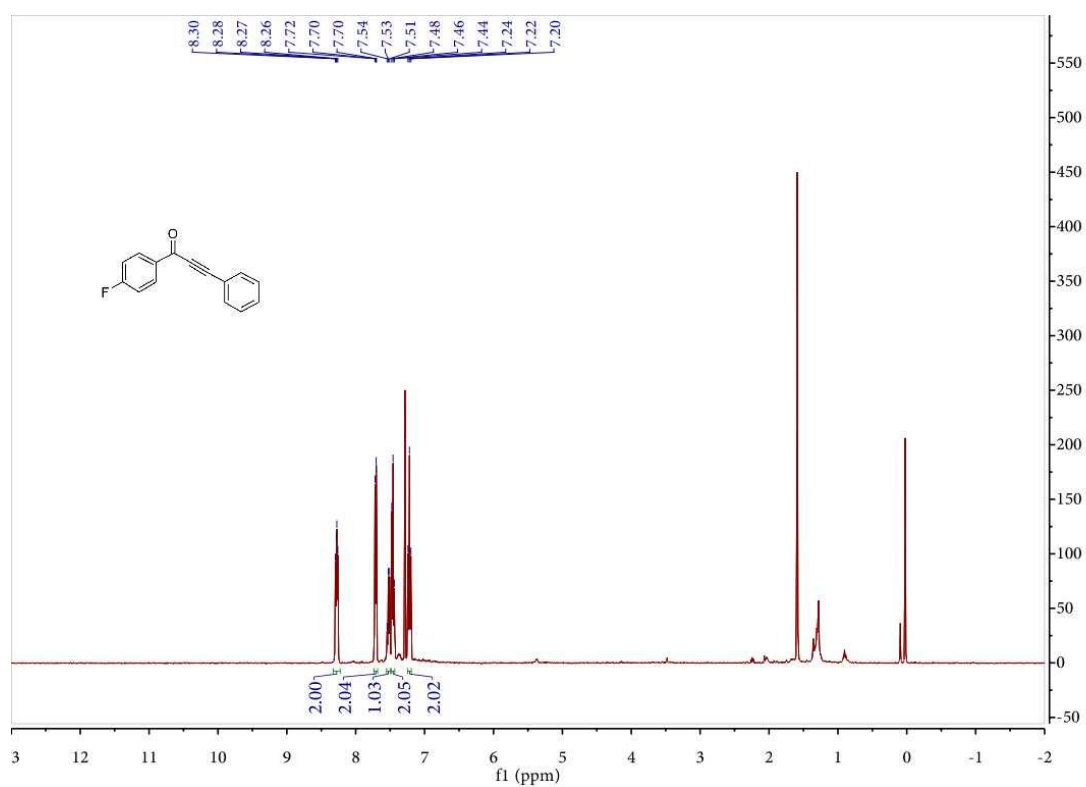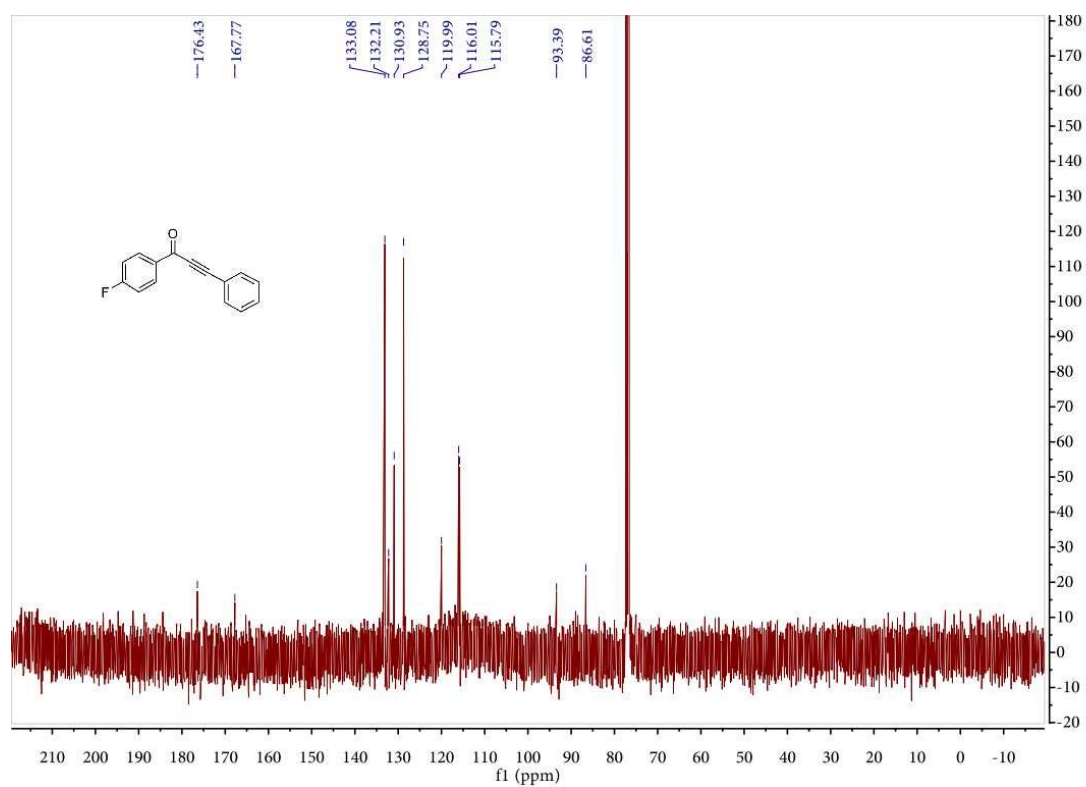

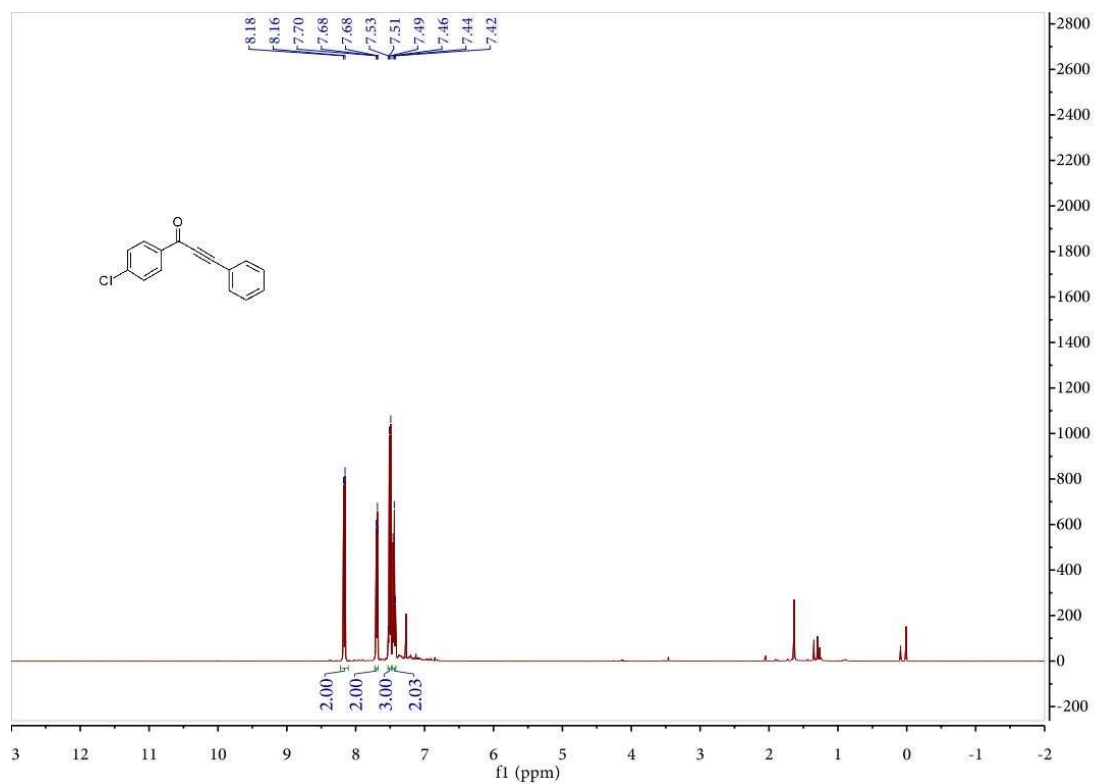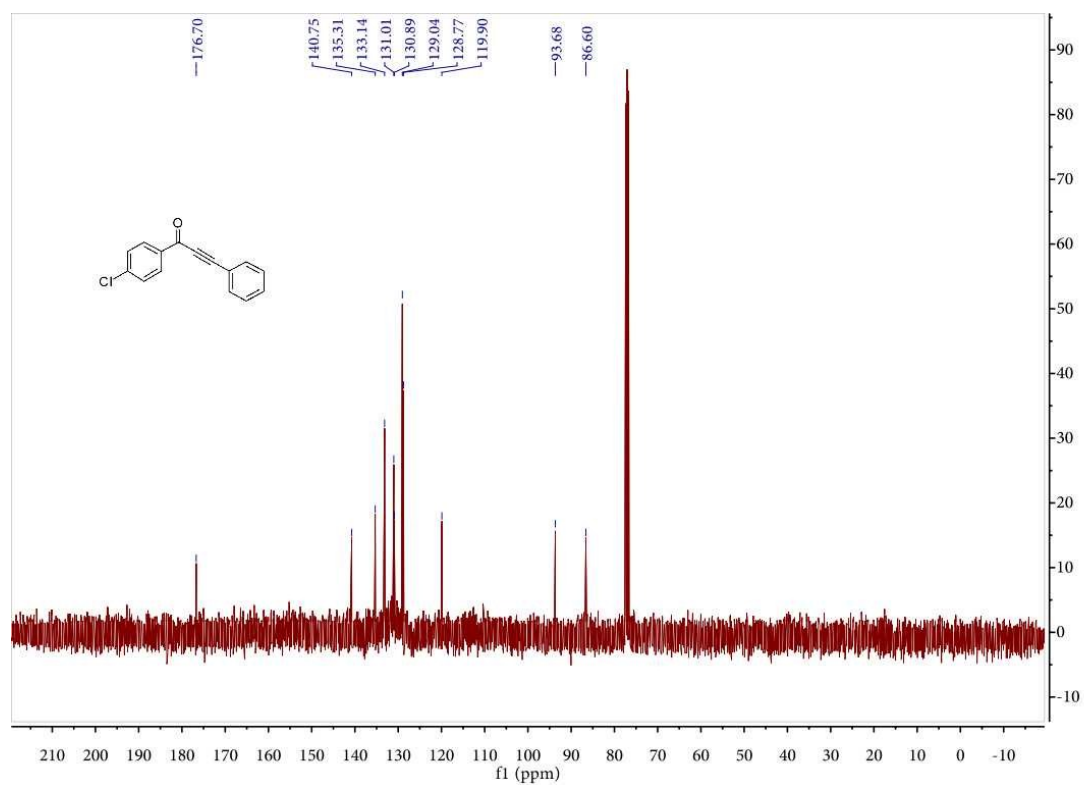

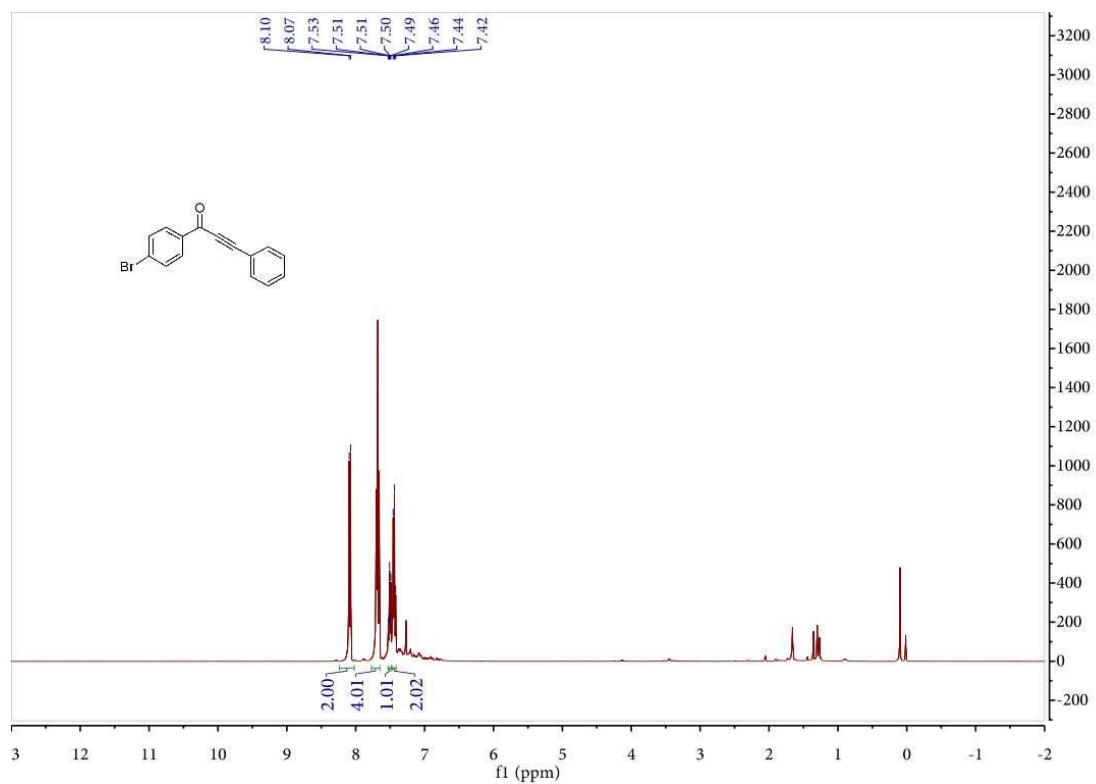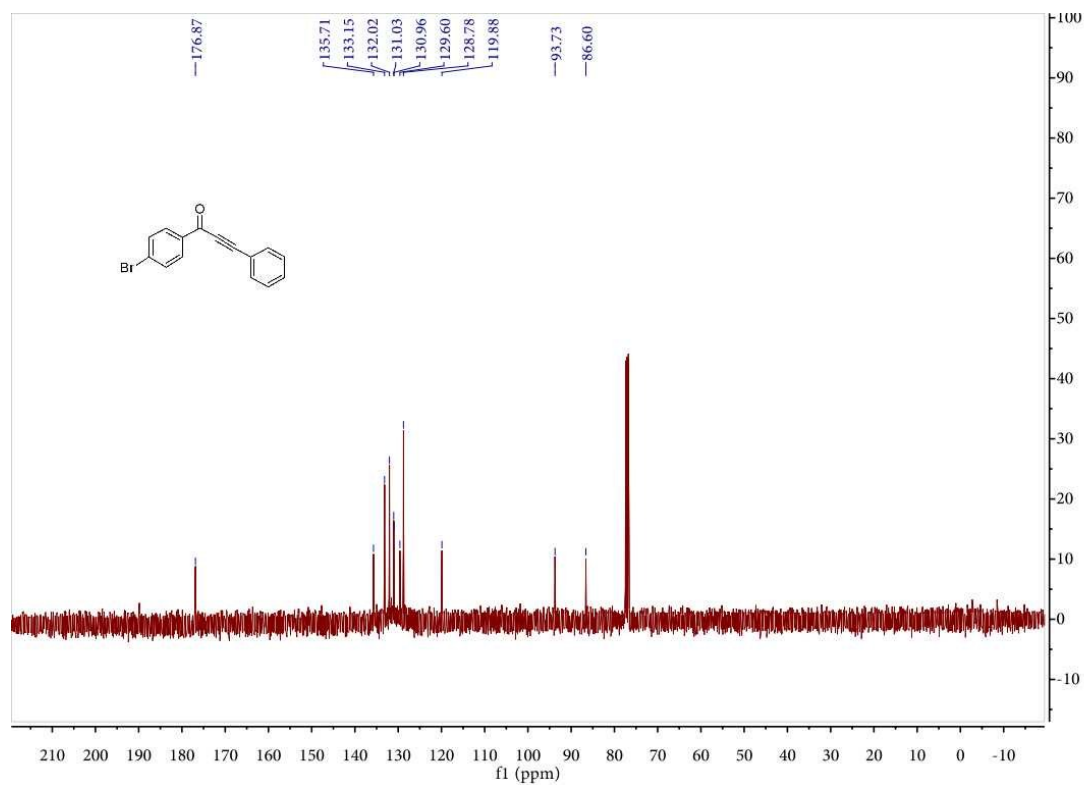

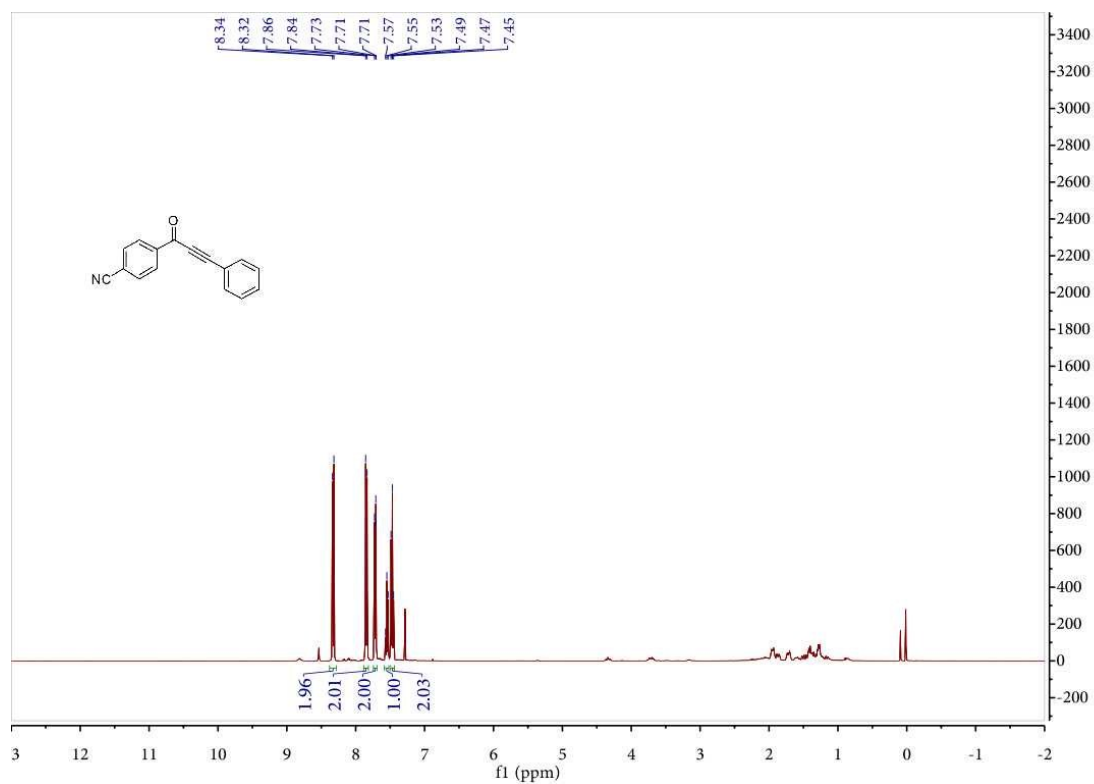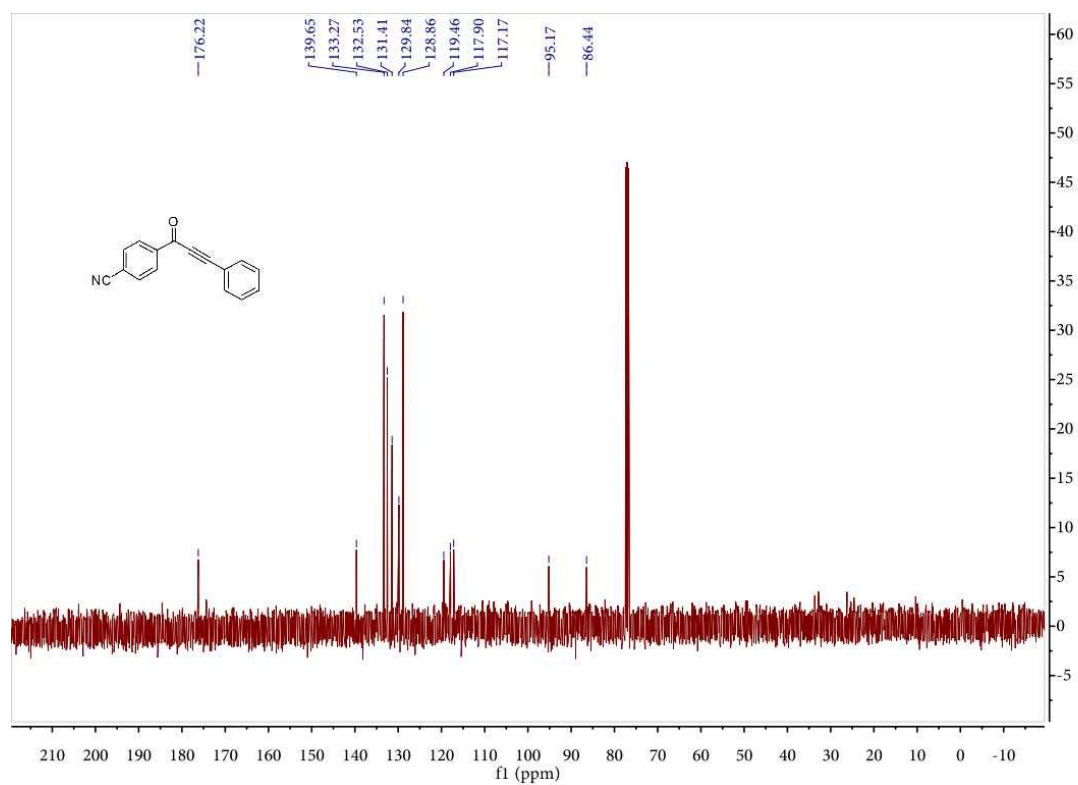

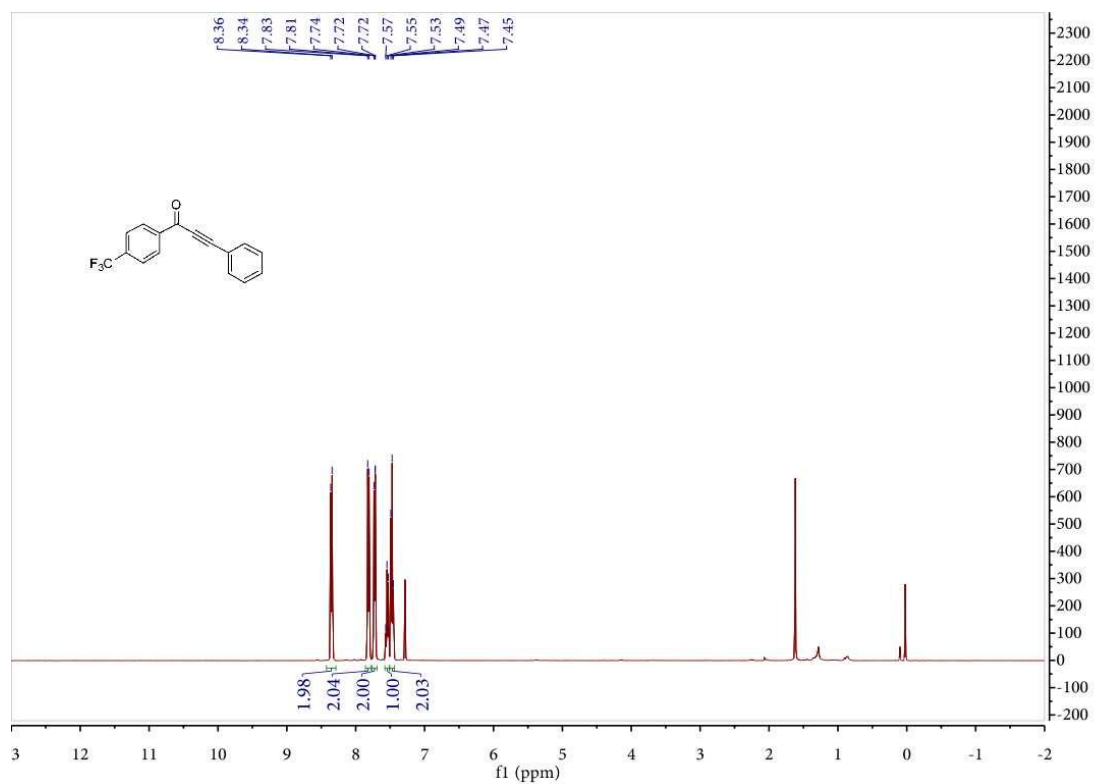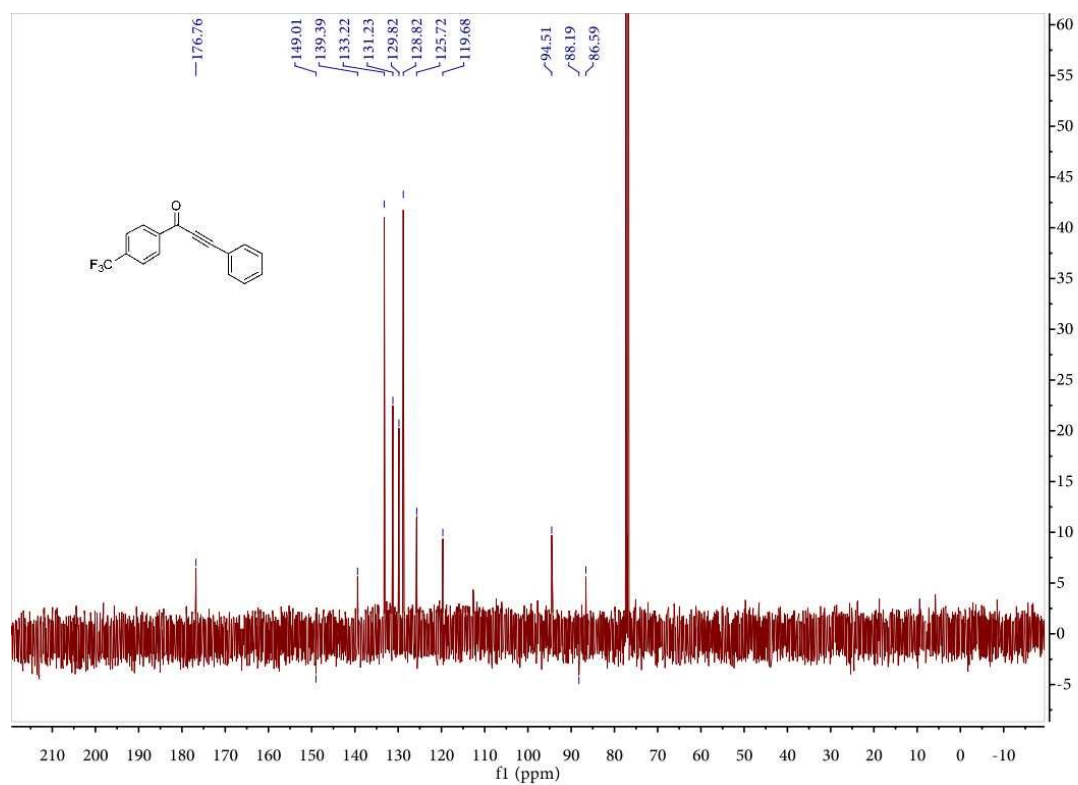

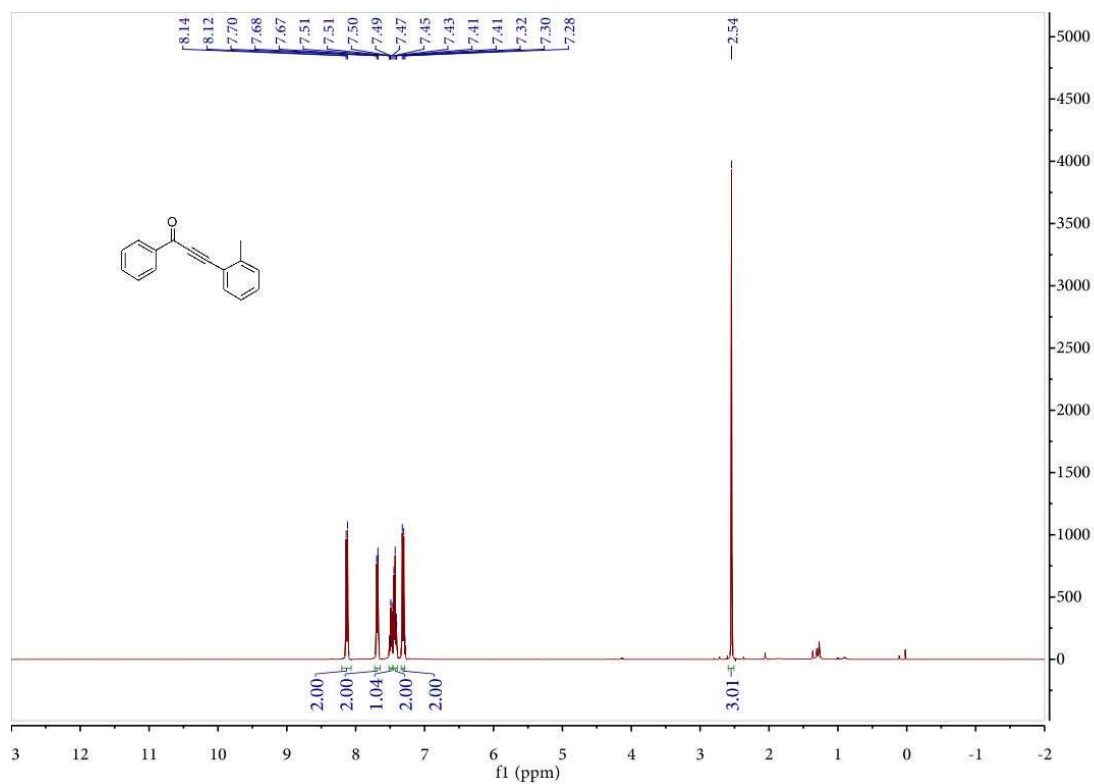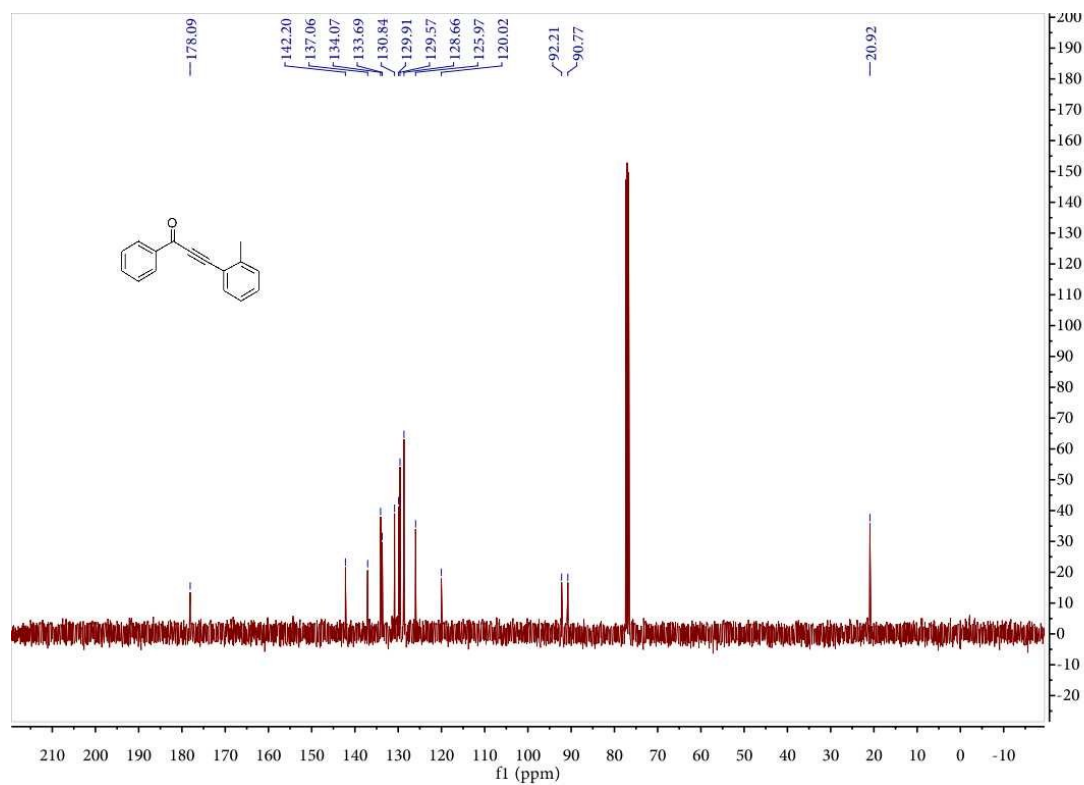

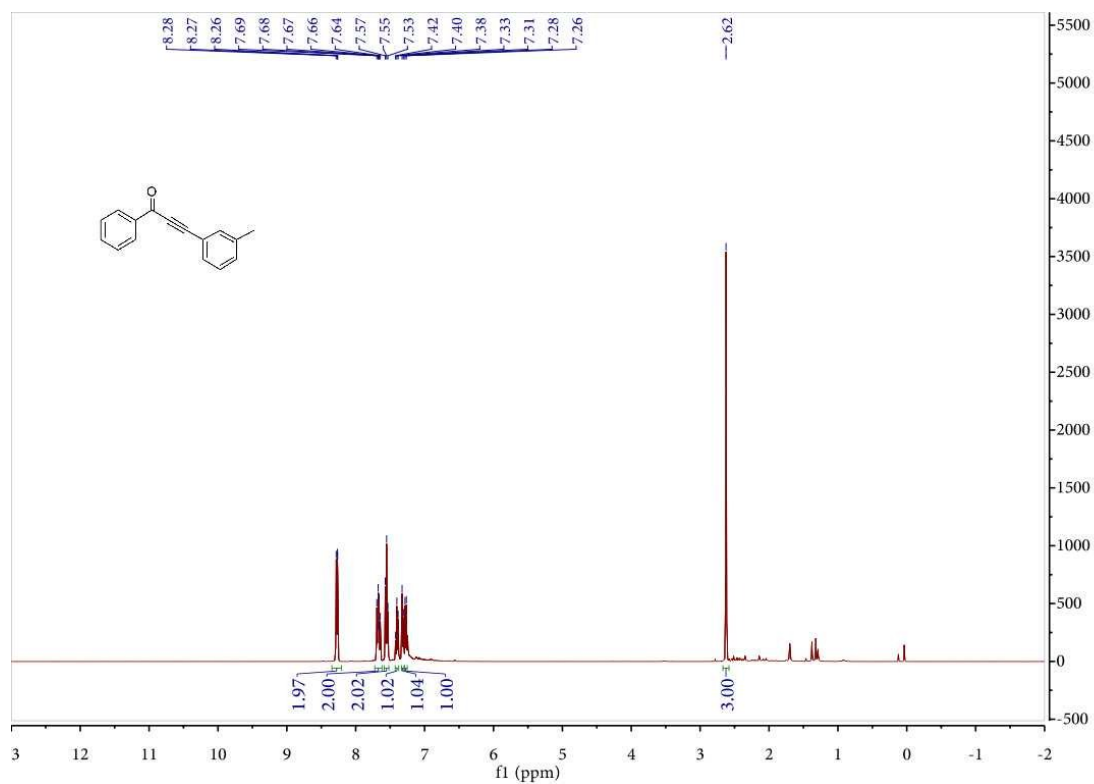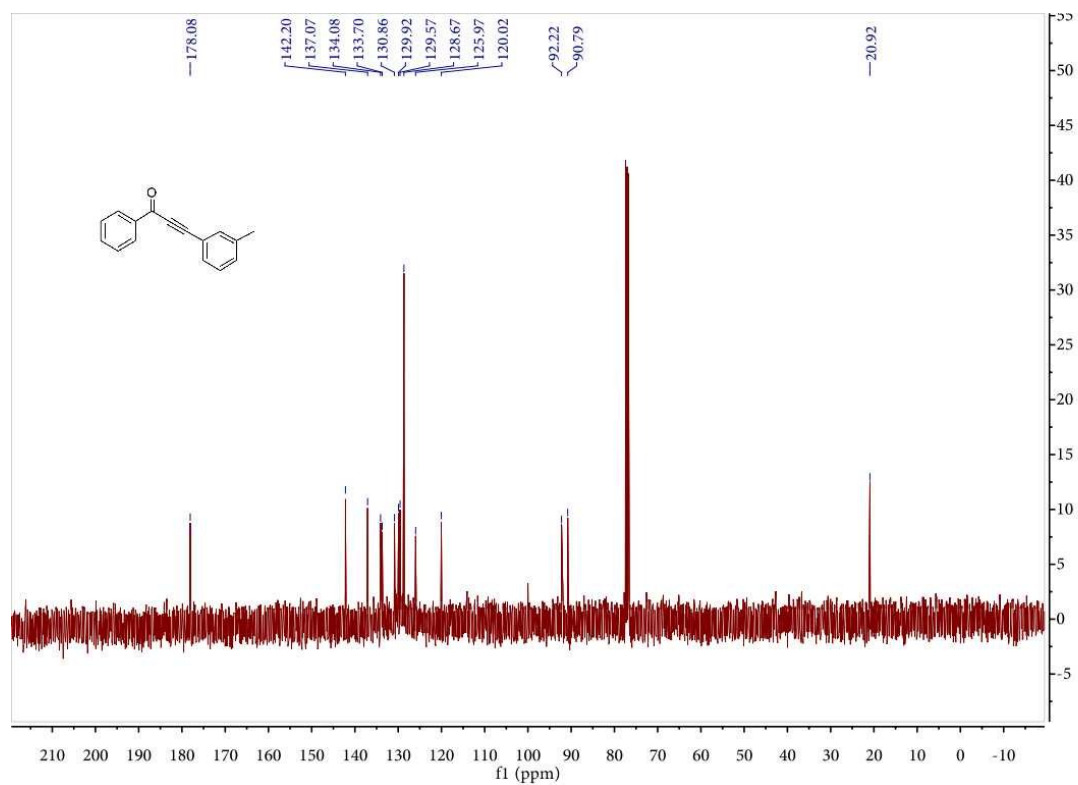

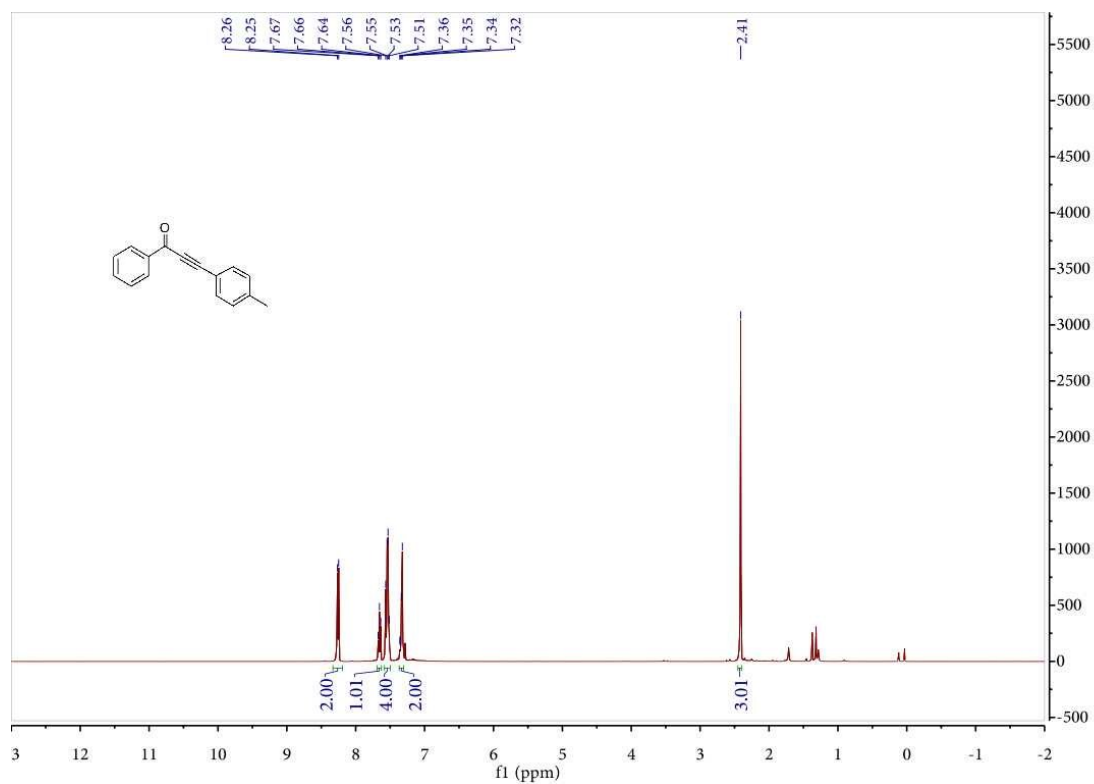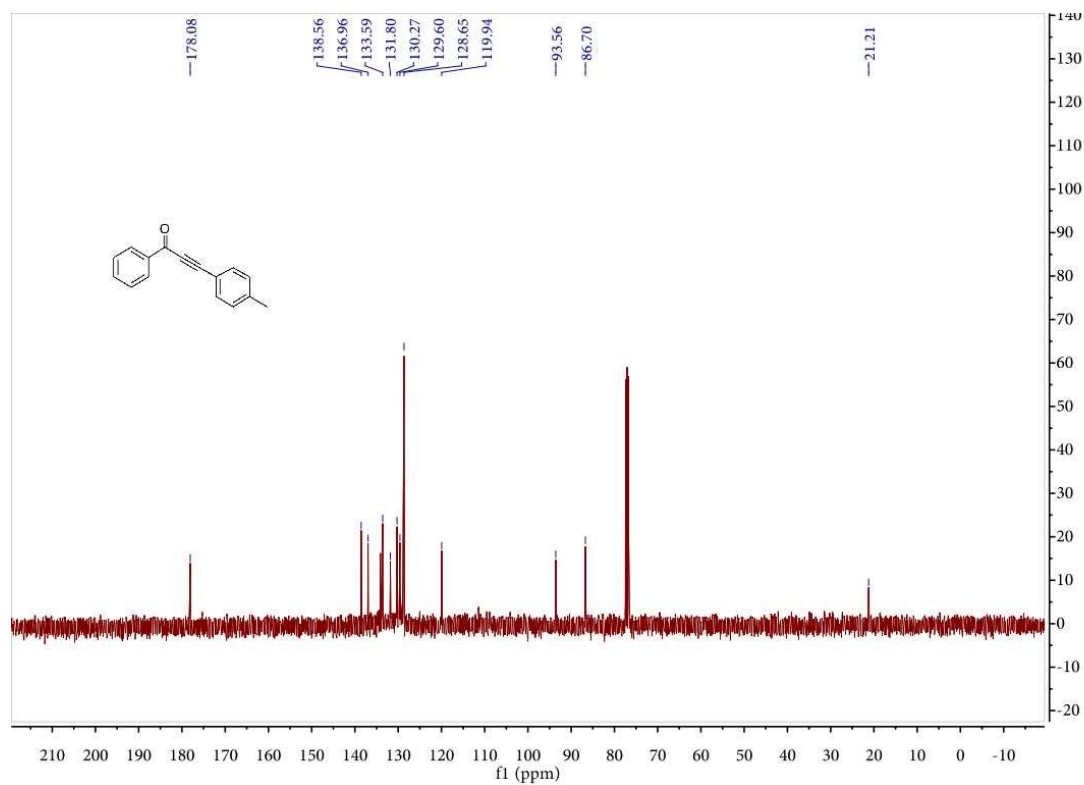



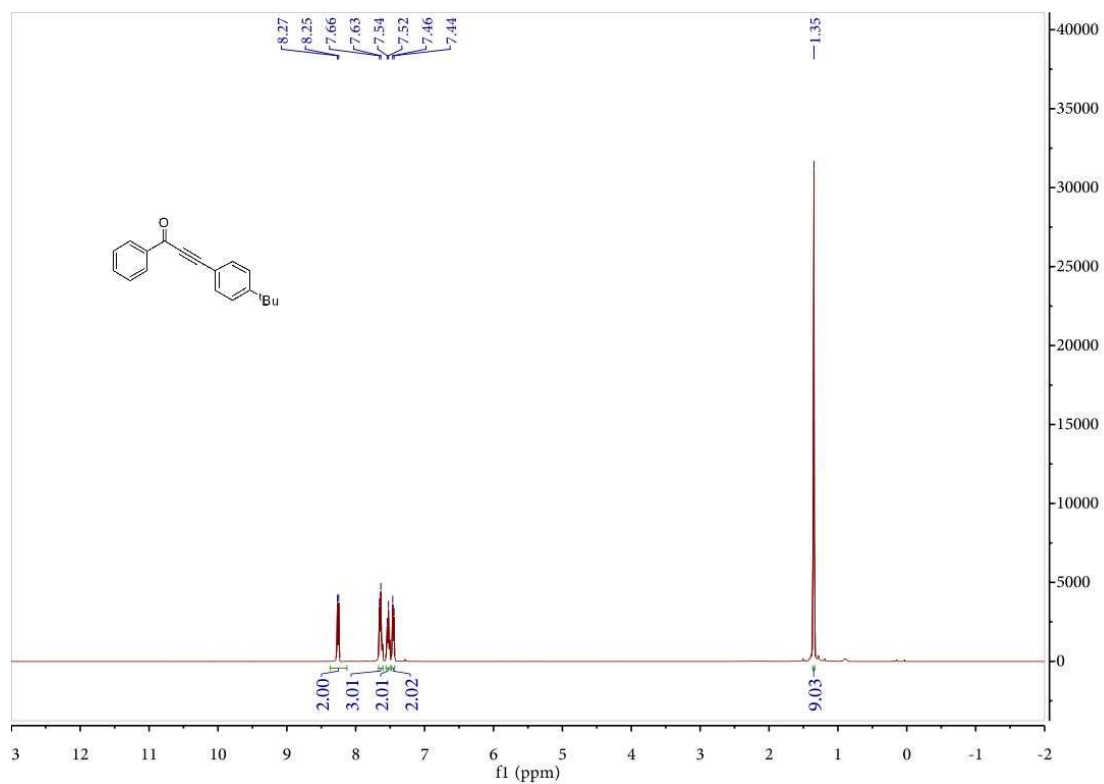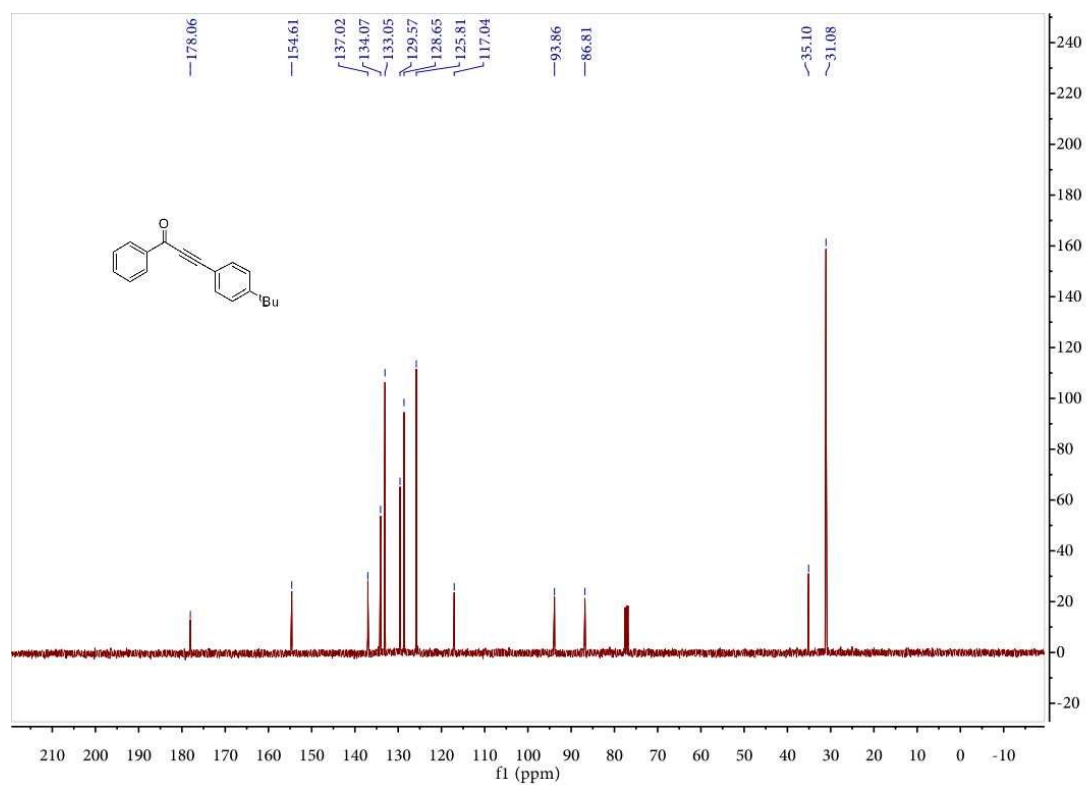

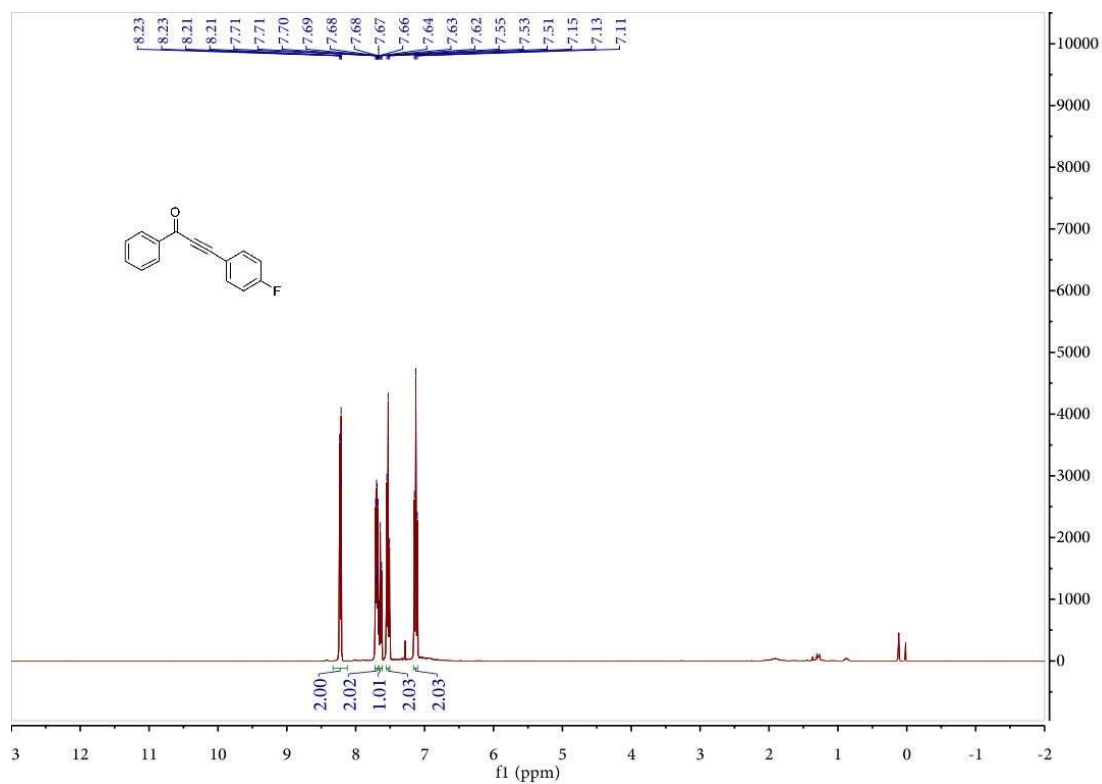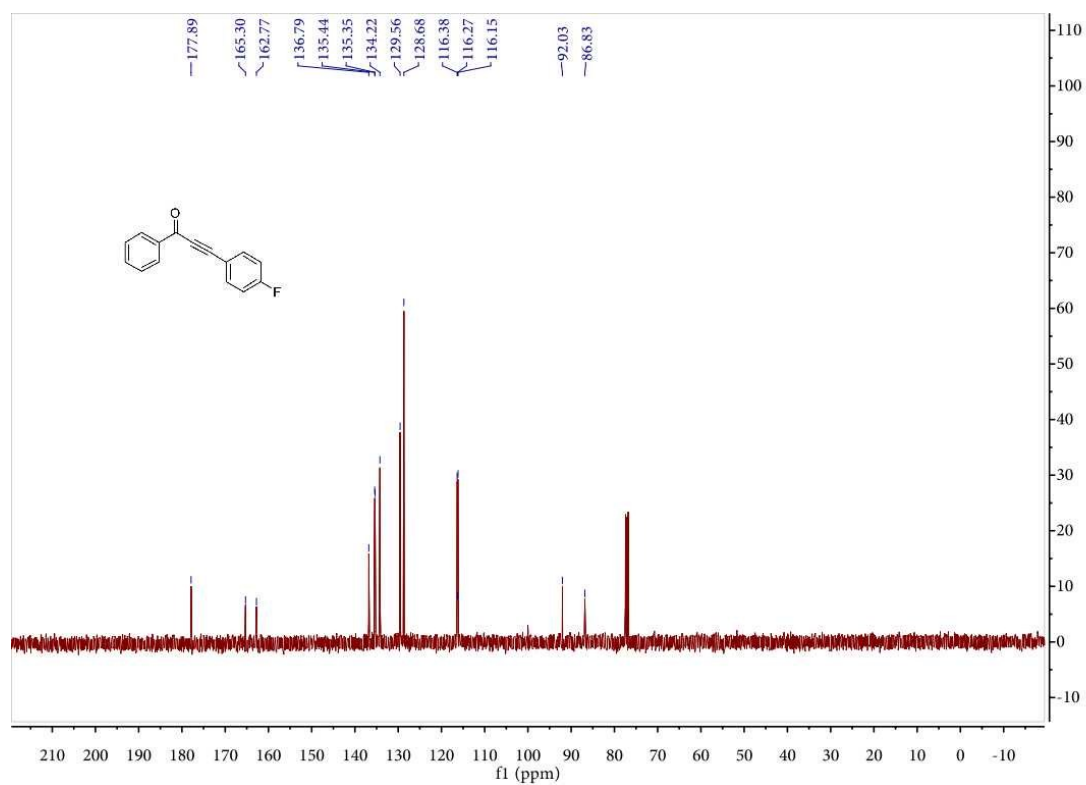

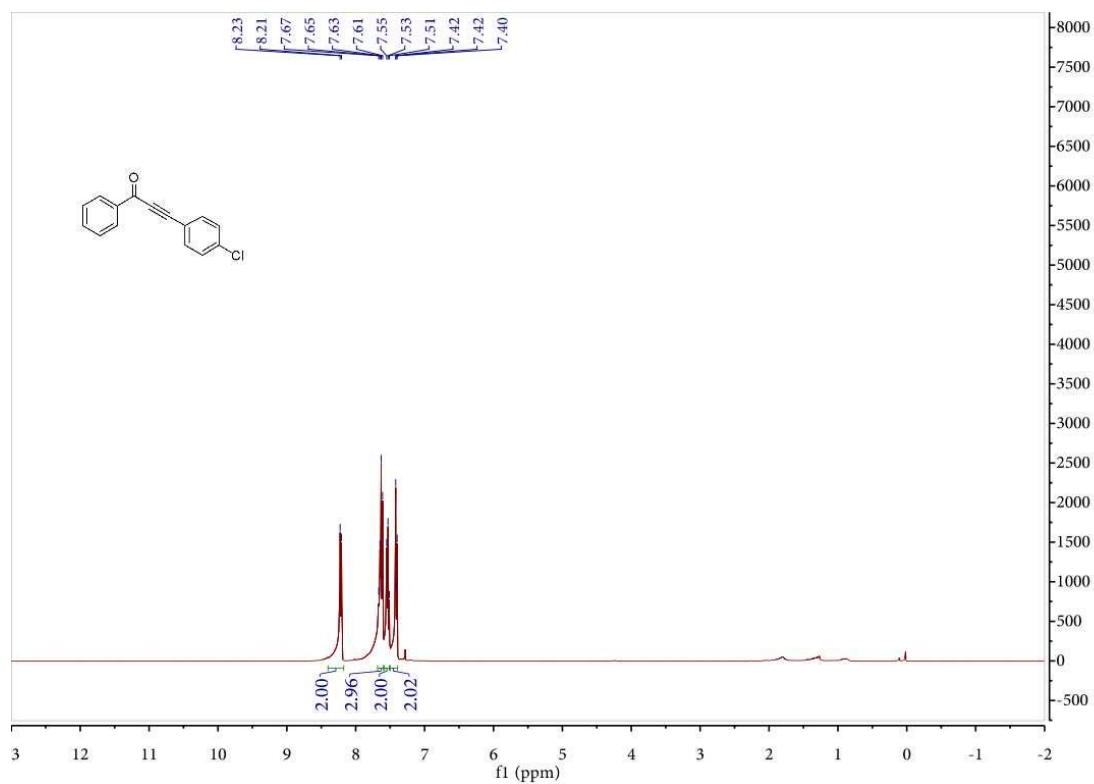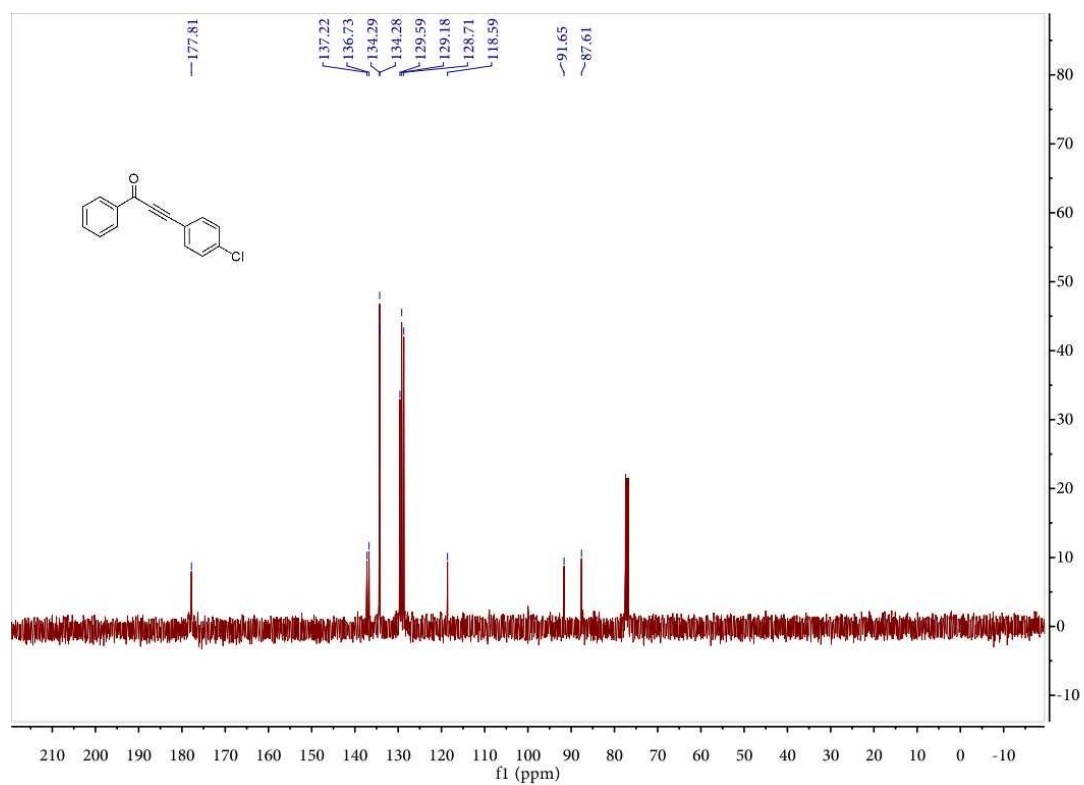

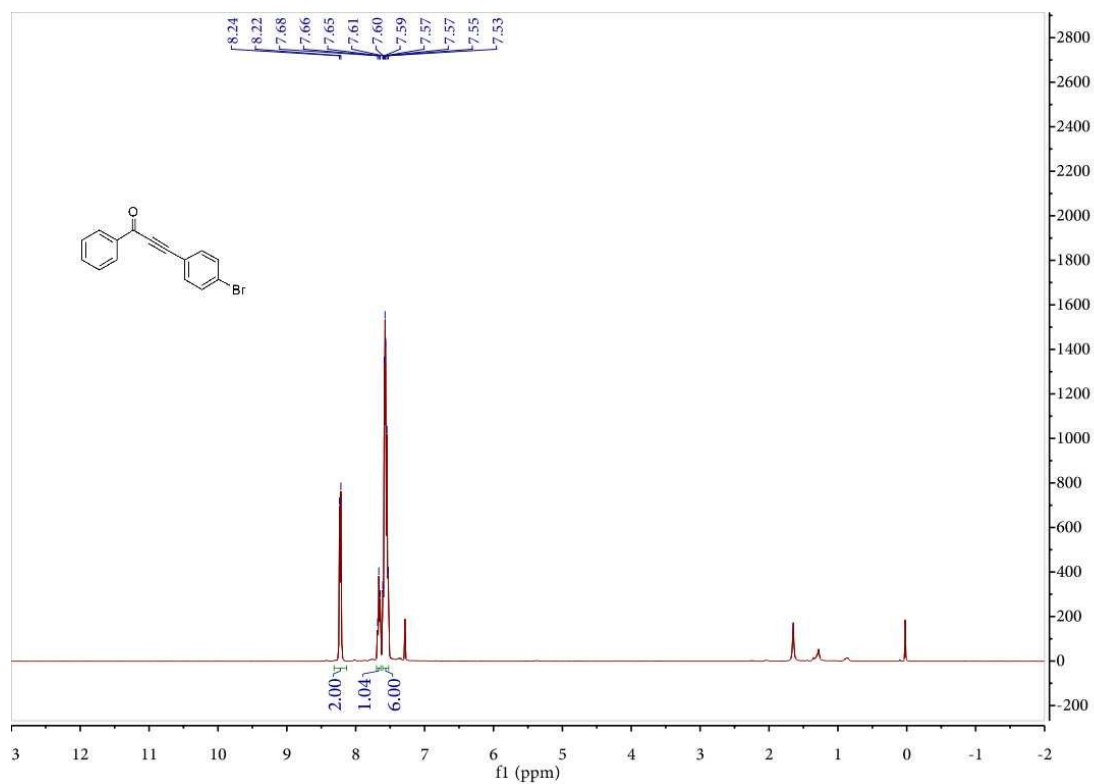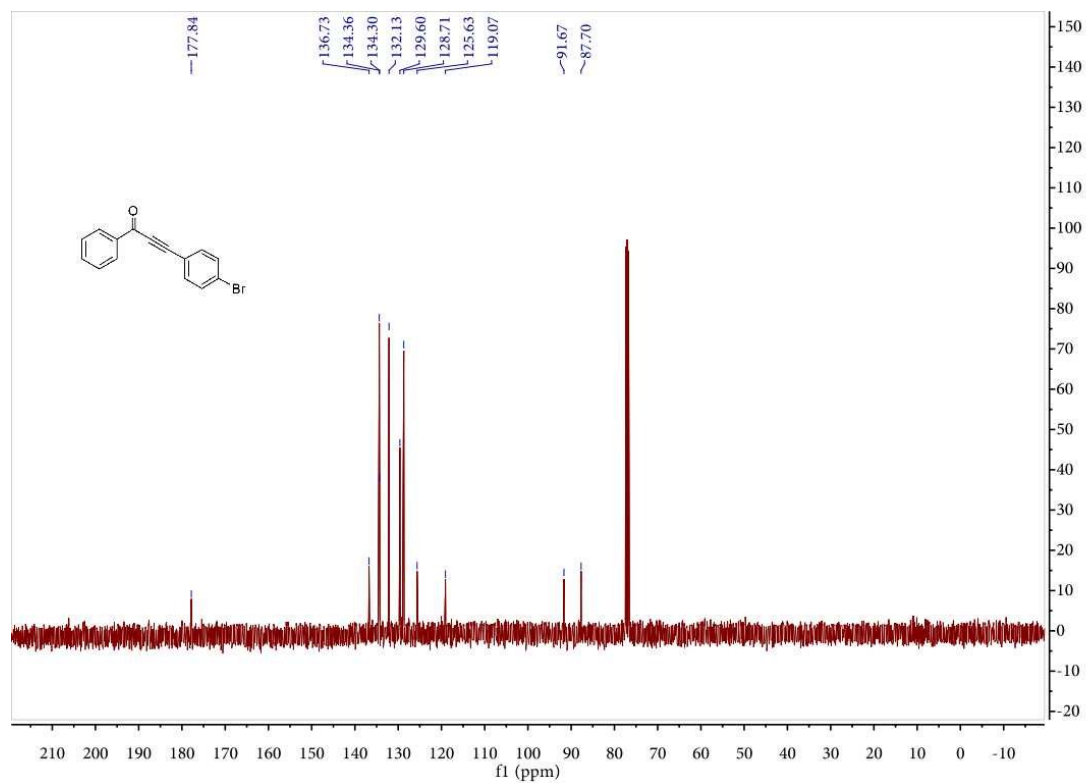

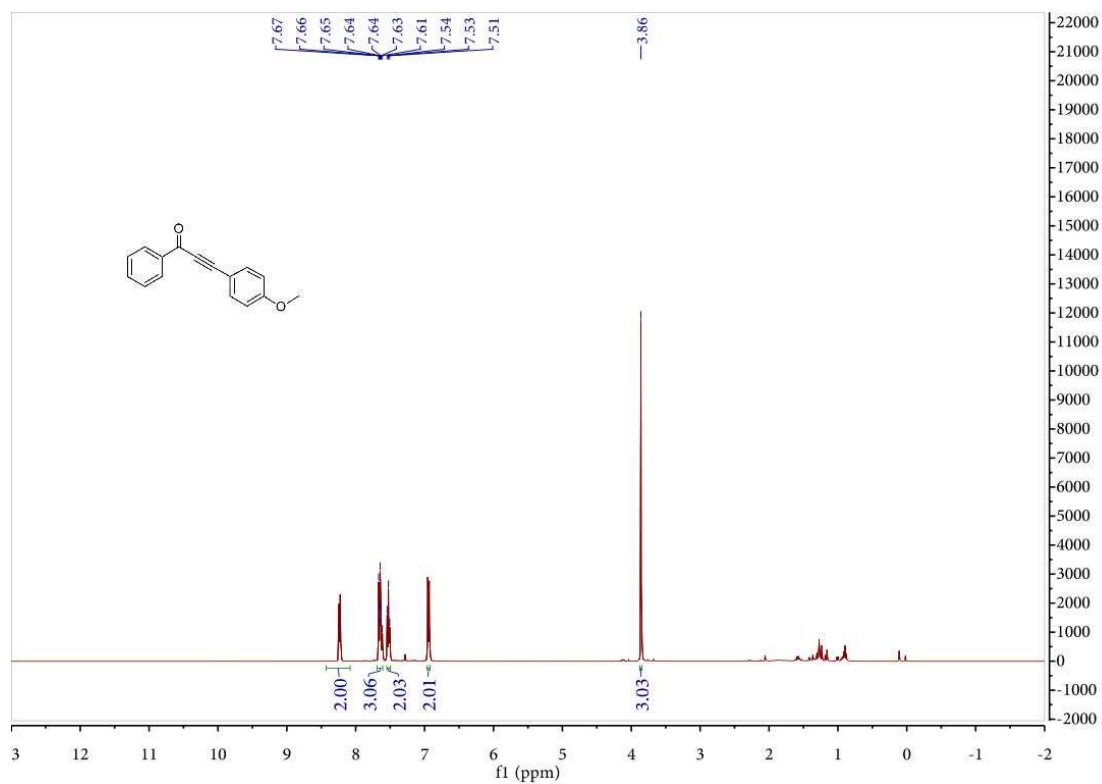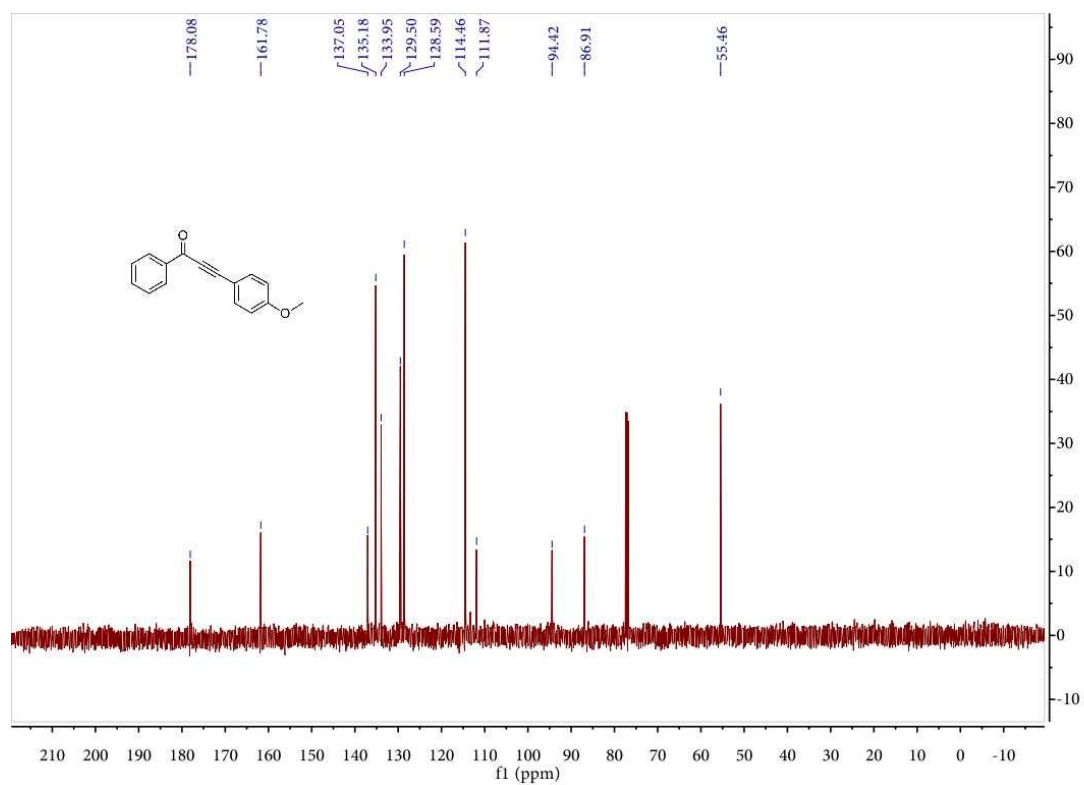

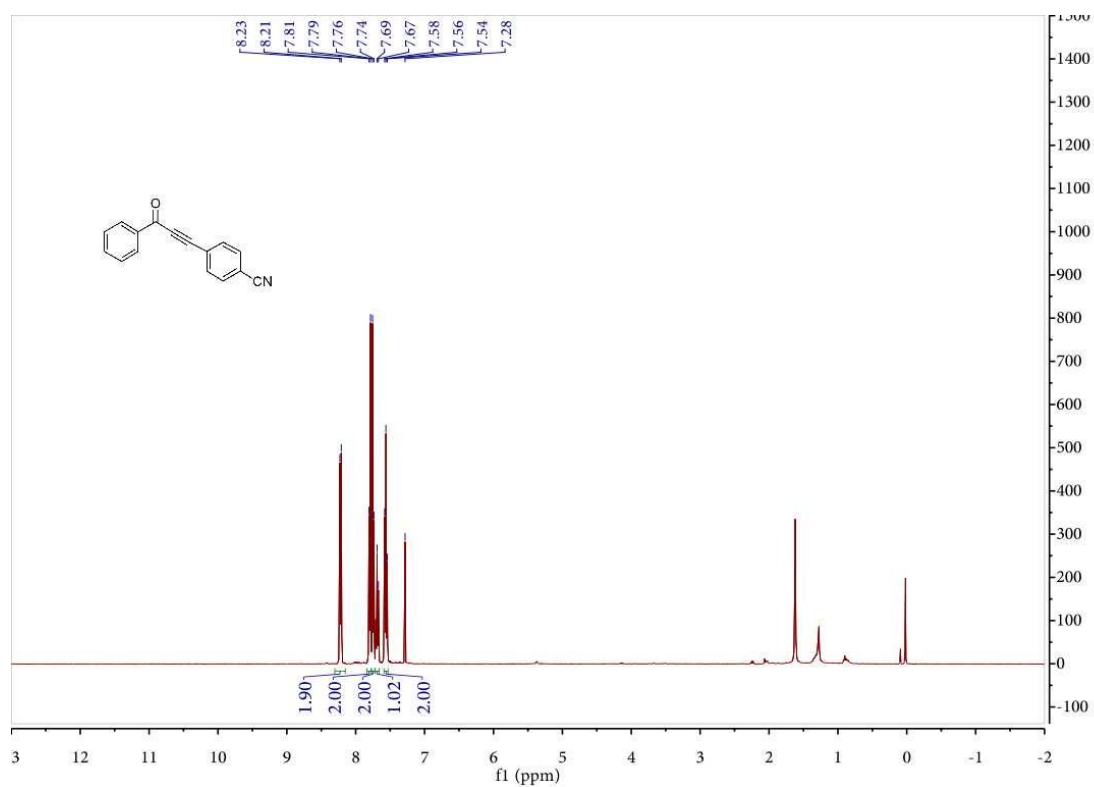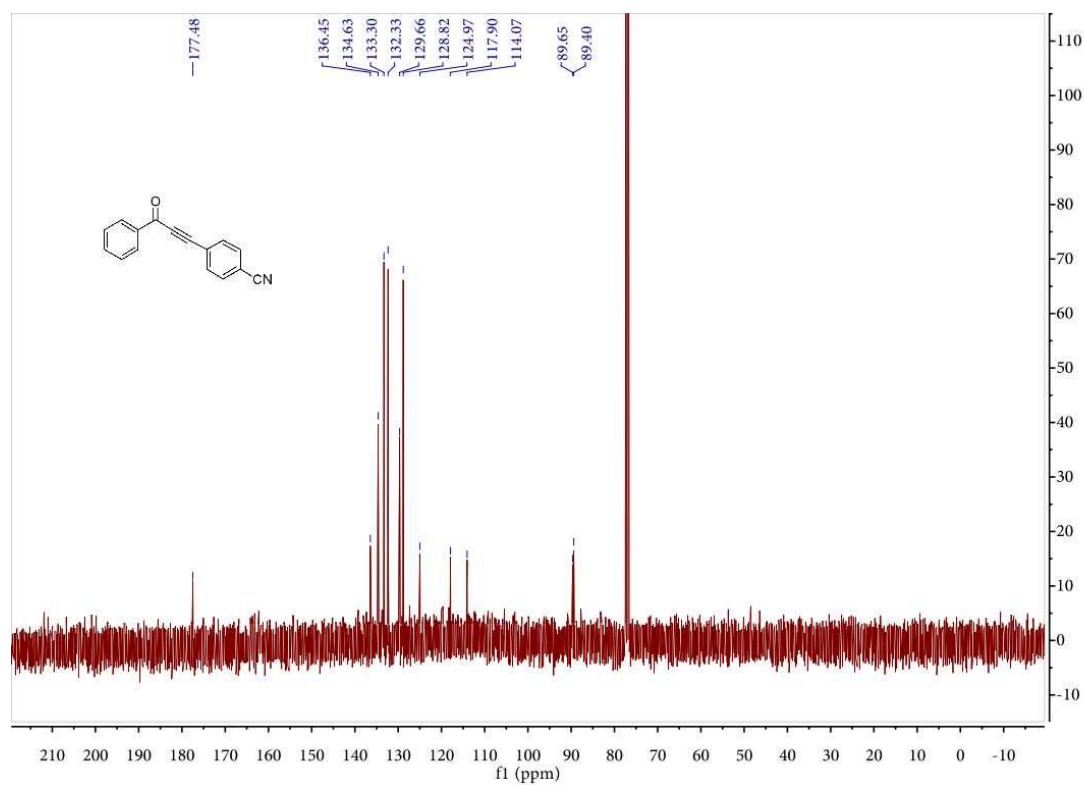

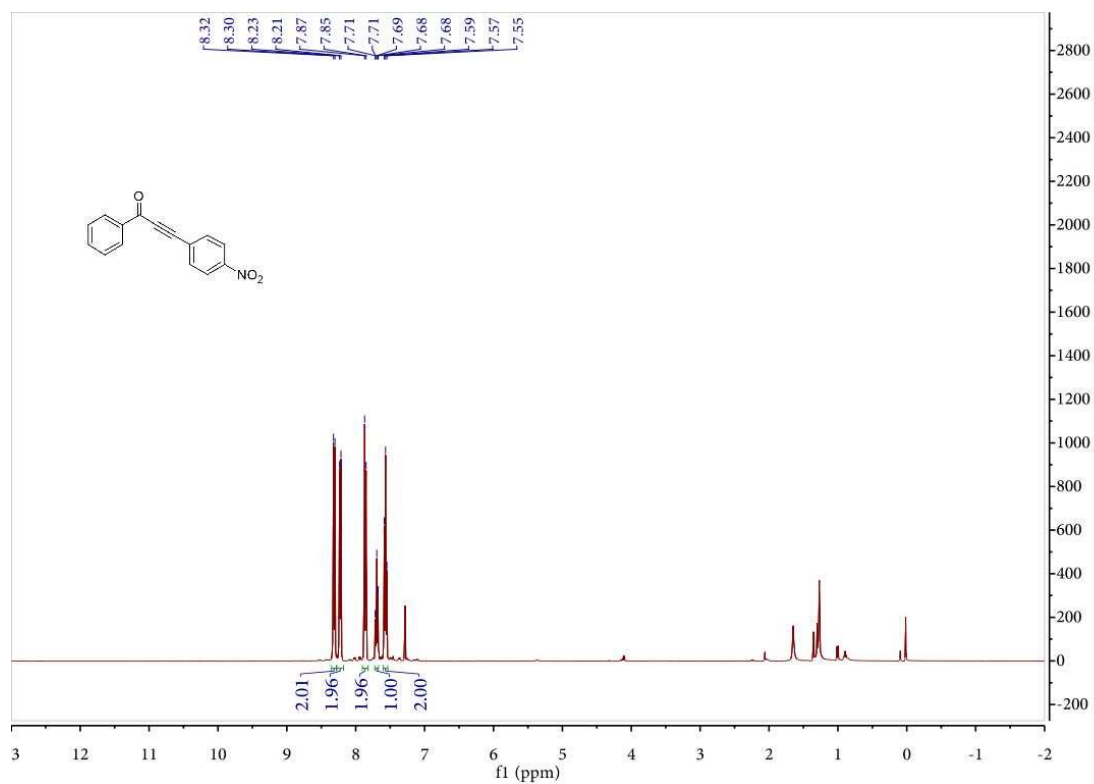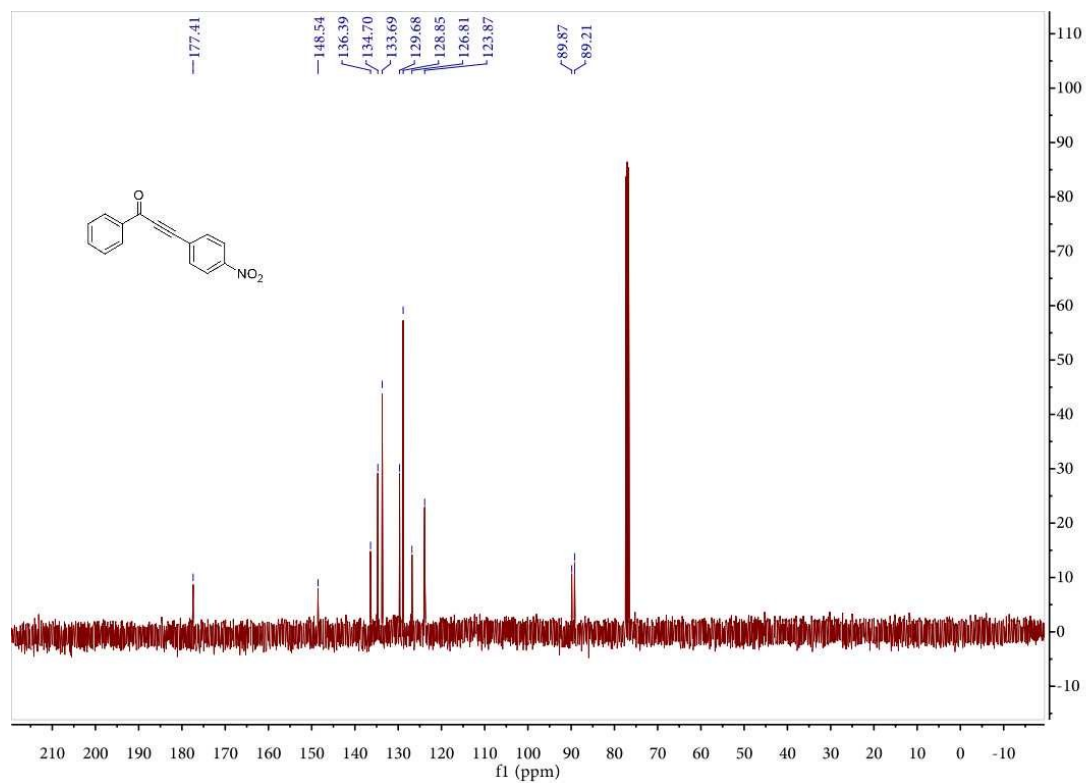

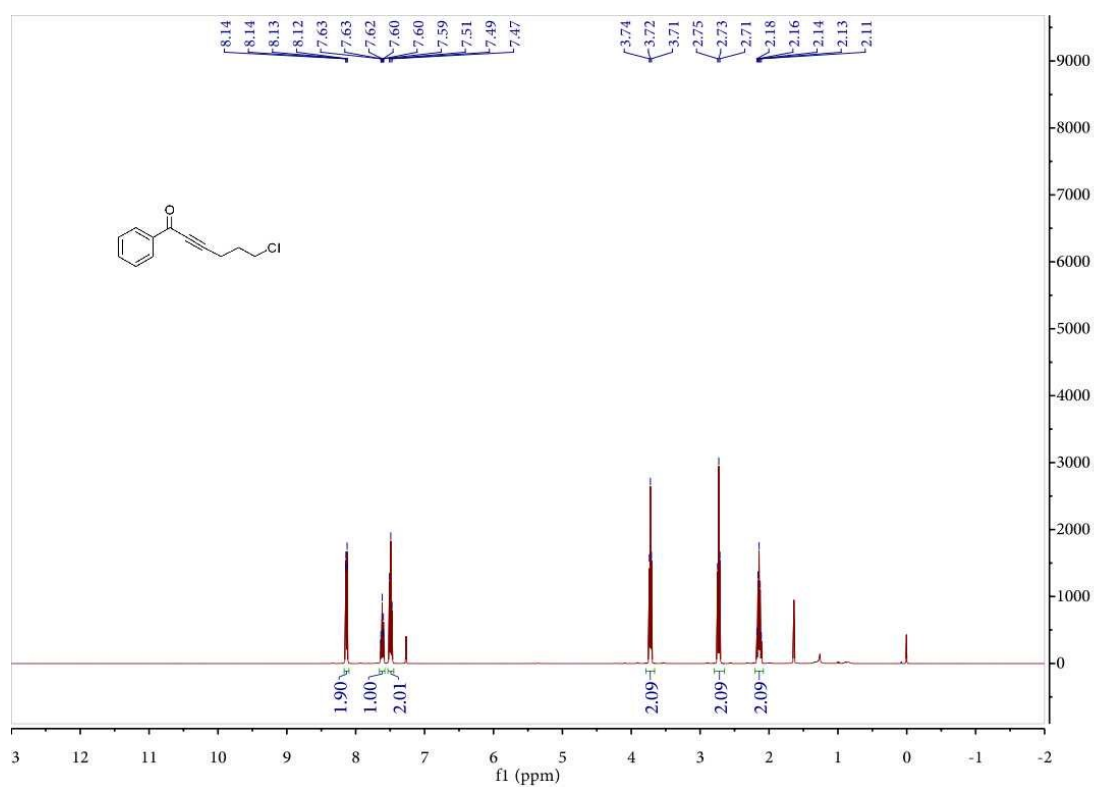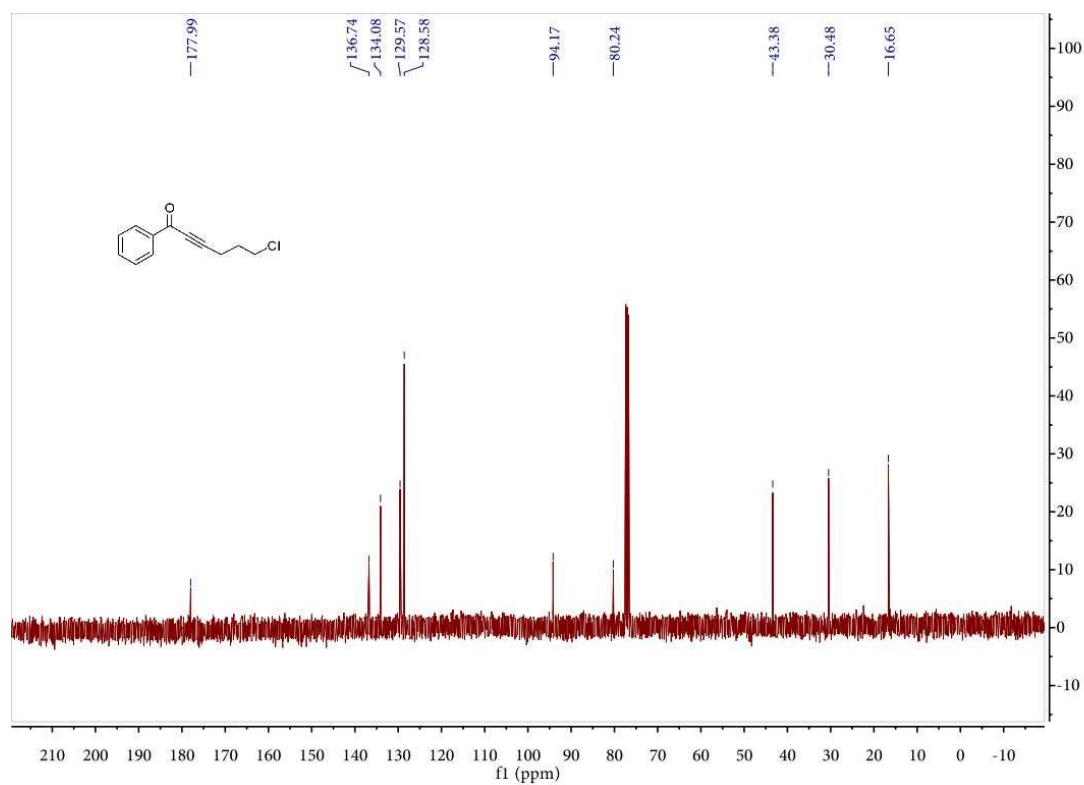

Supplement: c7cy01773a1.pdf [file c7cy01773a1.pdf]
